# Supplementary material for: Synthetic study toward vibralactone
Source: publisher site journal article supplement (doi:10.3762/bjoc.21.182), 2025-11-04

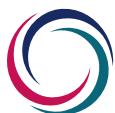

## Supporting Information

for

### Synthetic study toward vibrinalactone

Liang Shi, Jiayi Song, Yiqing Li, Jia-Chen Li, Shuqi Li, Li Ren, Zhi-Yun Liu and Hong-Dong Hao

*Beilstein J. Org. Chem.* **2025**, 21, 2376–2382. doi:10.3762/bjoc.21.182

### Characterization data and $^1\text{H}$ NMR, $^{13}\text{C}$ NMR spectra of the compounds

## Table of contents

|                                                       |     |
|-------------------------------------------------------|-----|
| 1. General experimental details .....                 | S2  |
| 1.1. Materials .....                                  | S2  |
| 1.2. Instrumentation .....                            | S3  |
| 2. Experimental procedures .....                      | S4  |
| 3. $^1\text{H}$ and $^{13}\text{C}$ NMR spectra ..... | S15 |

## 1. General experimental details

Unless otherwise stated, all reactions were performed with magnetic stirring under a positive pressure of nitrogen or argon gas. Oven-dried glassware (over temperature of 150 °C) was further dried with a heat gun at 650 °C under vacuum, followed by back-filling with inert gas, three times and fitted with rubber septa prior to use. Solids were added under inert gas counter flow or were dissolved and transferred in the appropriate solvent. Solutions and liquid reagents were transferred to reaction vessels by oven-dried stainless-steel cannulas or nitrogen-flushed syringes. Low temperature reactions were carried out in a Dewar vessel filled with acetone/dry ice (−78 °C) or distilled water/ice (0 °C). High-temperature reactions were conducted using a heated silicon oil bath in reaction vessels equipped with a reflux condenser.

### 1.1 Materials

Dry tetrahydrofuran (THF), dichloromethane (CH<sub>2</sub>Cl<sub>2</sub>), ethanol (EtOH), toluene (PhMe) and methanol (MeOH) were purchased from Tansoole company and stored over molecular sieves. Ethyl acetate (EtOAc), petroleum ether (PE), methyl *tert*-butyl ether (*t*-BuOMe) used specifically for extraction and flash column chromatography were purchased from commercial sources. All other solvents and reagents were purchased from commercial sources (Sigma Aldrich, Energy chemical, 3A, Adamas).

Reactions were monitored by thin-layer chromatography (TLC) using silica gel F254 pre-coated glass plates (Merck) and visualized by exposure to ultraviolet light ( $\lambda = 254$  nm) or by staining with aqueous potassium permanganate (KMnO<sub>4</sub>) solution (7.5 g KMnO<sub>4</sub>, 50 g K<sub>2</sub>CO<sub>3</sub>, 6.25 mL aqueous 10% NaOH, 1000 mL distilled H<sub>2</sub>O), phosphomolybdic acid hydrate (PMA) solution (10.0 g PMA, 100 mL EtOH) followed by heating with a heat gun (150–600 °C). Flash column chromatography was performed using silica gel (60 Å, 40–63 µm, Merck) and a forced flow of eluent.

## 1.2 Instrumentation

NMR spectra were recorded on a Bruker Avance III HD 500 MHz and 400 MHz spectrometer equipped with a CryoProbe<sup>TM</sup>. Chemical shifts were reported in parts per million (ppm) respectively to the residual solvent signal (<sup>1</sup>H NMR: CDCl<sub>3</sub>: 7.26 ppm; C<sub>6</sub>D<sub>6</sub>: 7.16 ppm; <sup>13</sup>C NMR: CDCl<sub>3</sub> 77.2 ppm; C<sub>6</sub>D<sub>6</sub>: 128.06 ppm). The reported data are represented as follows: chemical shift in parts per million (ppm,  $\delta$  scale), multiplicity, coupling constants  $J$  in Hz, integration intensity and proton assignment. Abbreviations used for analysis of multiplets are as follows: s (singlet), br (broad singlet), d (doublet), t (triplet), q (quartet), quin (quintet), h (hextet), and m (multiplet). Variable-temperature NMR spectroscopy was performed at the Northwest A&F University NMR facility. Mass spectroscopy (MS) experiments were performed in high resolution with an AB SCIEX Triple TOF 5600+ spectrometer (AB SCIEX, Boston, MA, USA). IR spectra were recorded on a Perkin-Elmer Frontier FT-IR spectrometer.

## 2. Experimental procedures

### Synthesis of compound 15

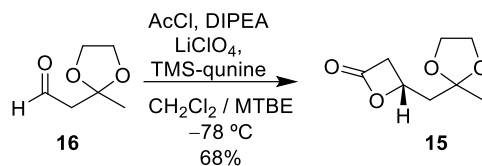

**Preparation of TMS-quinine:** To a stirred solution of quinine (2.00 g, 6.16 mmol) in dry CH<sub>2</sub>Cl<sub>2</sub> (20 mL) at 20 °C was added TMSCl (0.78 mL, 6.16 mmol), the mixture was stirred at 20 °C for 5 h. After the complete transformation of the starting material, evaporation of the solvent and purification of the residue via flash column chromatography (CH<sub>2</sub>Cl<sub>2</sub>/MeOH 20:1) gave product TMS-quinine (2.19 g, 5.53 mmol, 90%) as a white solid.

To a stirred solution of TMS-quinine (2.33 g, 5.87 mmol) and LiClO<sub>4</sub> (3.12 g, 29.33 mmol) in 14 mL of *t*-BuOMe was added 28 mL of CH<sub>2</sub>Cl<sub>2</sub> and the reaction mixture was cooled to -78 °C. To the reaction mixture was added *N,N*-diisopropylethylamine (6.06 mL, 36.68 mmol) followed by the aldehyde **16** (1.91 g, 14.67 mmol). Then, a solution of acetyl chloride (2.09 mL, 29.33 mmol) in CH<sub>2</sub>Cl<sub>2</sub> (7 mL) was added over 2 hours by a syringe pump. The reaction mixture was stirred for 12 h at -78 °C and quenched by H<sub>2</sub>O (20 mL), then extracted with *t*-BuOMe (3 × 20 mL) and the combined organic layers were dried over anhydrous Na<sub>2</sub>SO<sub>4</sub> and concentrated in vacuo. The crude product mixture was purified by flash chromatography (petroleum ether/*t*-BuOMe 2:1) to give product **15** (1.72 g, 10.00 mmol, 68%) as a yellow oil.

**Data for 15:** *R*<sub>f</sub> = 0.45 (silica, EtOAc : petroleum ether = 1:2, stains with PMA); **<sup>1</sup>H NMR (400 MHz, Chloroform-*d*):** δ 4.73 – 4.66 (m, 1H), 3.99 – 3.89 (m, 4H), 3.56 (dd, *J* = 16.4, 6.0 Hz, 1H), 3.23 (dd, *J* = 16.4, 4.4 Hz, 1H), 2.37 (dd, *J* = 14.4, 6.0 Hz, 1H), 2.07 (dd, *J* = 14.4, 7.2 Hz, 1H), 1.35 (s, 3H) ppm. **<sup>13</sup>C NMR (100MHz, Chloroform-*d*):** δ 168.4, 108.2, 67.9, 64.9, 64.8, 44.1, 43.6, 24.6 ppm. **HRMS(ESI)** for C<sub>8</sub>H<sub>13</sub>O<sub>4</sub><sup>+</sup> [M+H]<sup>+</sup>: calcd. 173.0808, found 173.0809. **IR (neat)** *v*<sub>max</sub> 2985, 2890, 1827, 1449, 1213, 1130, 1045, 815, 754 cm<sup>-1</sup>.

### Synthesis of compound S1

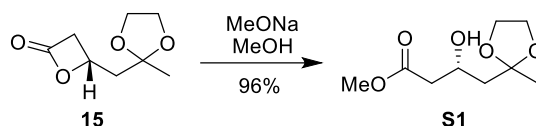

To a stirred solution of **15** (627 mg, 3.64 mmol) in 20 mL MeOH at 32 °C was added MeONa (40 mg, 0.73 mmol). After 30 min, the mixture was concentrated and purified by flash chromatography (EtOAc/petroleum ether 1:2) to afford product **S1** (716 mg, 3.51 mmol, 96%) as a yellow oil.

**Data for S1:**  $R_f$  = 0.36 (silica, EtOAc : petroleum ether = 1:2, stains with PMA);  $^1\text{H}$  NMR (400 MHz, Chloroform- $d$ ):  $\delta$  4.35 – 4.27 (m, 1H), 3.99 – 3.94 (m, 4H), 3.68 (s, 3H), 3.66 (s, 1H), 2.50 (dd,  $J$  = 15.4, 7.6 Hz, 1H), 2.42 (dd,  $J$  = 15.6, 5.2 Hz, 1H), 1.86 (d,  $J$  = 6.0 Hz, 2H), 1.35 (s, 3H) ppm.;  $^{13}\text{C}$  NMR (100 MHz, Chloroform- $d$ ):  $\delta$  172.2, 110.0, 65.1, 64.7, 64.4, 51.8, 44.5, 41.9, 24.2 ppm.; HRMS ESI  $\text{C}_9\text{H}_{17}\text{O}_5^+$   $[\text{M}+\text{H}]^+$ : calcd. 205.1071, found 205.1075. IR (neat)  $\nu_{\text{max}}$  2985, 2955, 2892, 1737, 1214, 1176, 1141, 1049  $\text{cm}^{-1}$ . Enantiomeric excess: 48%, determined by HPLC (Daicel Chiralpak OD-H column, hexane/isopropanol = 90/10, flow rate 1 mL/min, 220 nm, 25°C):  $t_R$  = 3.992 min (major),  $t_R$  = 5.187 min (minor).

Although this cinchona alkaloid-catalyzed acid chloride–aldehyde asymmetric cyclocondensation has been applied in several total syntheses, it unfortunately, in the current case, afforded only 48% ee for  $\beta$ -lactone **15**. So the optical rotation value of all the intermediates reported here are not measured and alternative methods for the synthesis of compound **S1** are still needed.

### Synthesis of compound 17

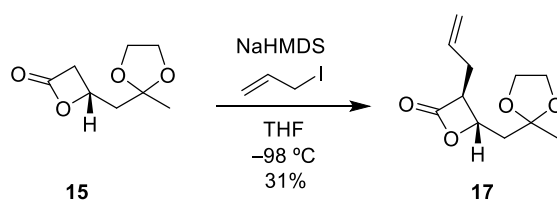

To a stirred solution of the NaHMDS (2.67 mL, 2.67 mmol, 1.0 M solution in THF) in THF (25 mL) at  $-98\text{ }^\circ\text{C}$  was added **15** (438 mg, 2.54 mmol). After stirring for 15 min, allyl iodide (0.35 mL, 3.82 mmol) was added to the reaction mixture and stirred for additional 5 h. The mixture was quenched by saturated  $\text{NH}_4\text{Cl}$  aqueous solution and extracted with EtOAc ( $3 \times 10$  mL). The combined organic extract was dried over anhydrous  $\text{Na}_2\text{SO}_4$  and concentrated in vacuo. The crude product was purified via flash chromatography (EtOAc/petroleum ether 1:5) to provide **17** (165 mg, 0.78 mmol, 31%) as a yellow oil.

**Data for 17:**  $R_f$  = 0.45 (silica, EtOAc : petroleum ether = 1:3, stains with PMA);  **$^1\text{H}$  NMR (500 MHz, Chloroform-*d*):**  $\delta$  5.86 – 5.77 (m, 1H), 5.20 – 5.14 (m, 2H), 4.48 – 4.43 (m, 1H), 3.99 – 3.90 (m, 4H), 3.46 – 3.40 (m, 1H), 2.53 (t,  $J$  = 7.0 Hz, 2H), 2.34 (dd,  $J$  = 14.5, 6.5 Hz, 1H), 2.08 (dd,  $J$  = 14.5, 7.0 Hz, 1H), 1.35 (s, 3H) ppm.

### Synthesis of compound 18

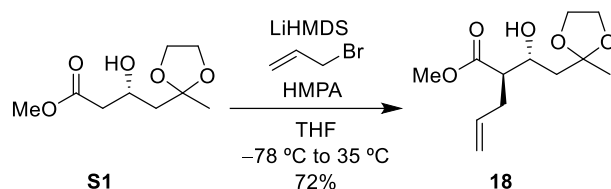

To a stirred solution of **S1** (2.92 g, 4.27 mmol) in dry tetrahydrofuran (80 mL) at  $-78\text{ }^\circ\text{C}$  was added LiHMDS (31.40 mL, 31.40 mmol, 1.0 M solution in THF) dropwise. After 30 min, the mixture was stirred at  $35\text{ }^\circ\text{C}$ , then allyl bromide (2.09 mL, 22.83 mmol) was added followed by HMPA (6.2 mL, 35.6 mmol). The reaction mixture was stirred at  $35\text{ }^\circ\text{C}$  for 3 h, then quenched with saturated aqueous  $\text{NH}_4\text{Cl}$ , extracted with *t*-BuOMe ( $3 \times 20\text{ mL}$ ), dried over anhydrous  $\text{Na}_2\text{SO}_4$  and concentrated in vacuo. The residue was purified by flash chromatography (EtOAc/petroleum ether 1:4) to give compound **18** (2.5 g, 10.22 mmol, 72%) as a yellow oil.

**Data for 18:**  $R_f$  = 0.43 (silica, EtOAc : petroleum ether = 1:2, stains with PMA).  **$^1\text{H}$  NMR (400MHz, Chloroform-*d*):**  $\delta$  5.78 – 5.66 (m, 1H), 5.06 (dd,  $J$  = 17.2, 1.6 Hz, 1H), 5.00 (d,  $J$  = 10.0 Hz, 1H), 4.07 – 4.00 (m, 1H), 3.99 – 3.94 (m, 4H), 3.68 (s, 3H), 3.63 (d,  $J$  = 2.4 Hz, 1H), 2.56 – 2.49 (m, 1H), 2.42 – 2.25 (m, 2H), 1.94 (dd,  $J$  = 14.6, 1.6 Hz, 1H), 1.79 (dd,  $J$  = 14.8, 9.6 Hz, 1H), 1.34 (s, 3H) ppm.  **$^{13}\text{C}$  NMR (100MHz, Chloroform-*d*):**  $\delta$  174.3, 135.2, 117.0, 110.2, 68.8, 64.8, 64.4, 51.6, 51.6, 42.5, 32.8, 24.3 ppm. **HRMS(ESI)** for  $\text{C}_{12}\text{H}_{21}\text{O}_5^+$   $[\text{M}+\text{H}]^+$ : calcd. 245.1384, found 245.1382. **IR (neat)**  $\nu_{\text{max}}$  2985, 2953, 2892, 1737, 1441, 1248, 1201, 1170, 1041  $\text{cm}^{-1}$ .

### Synthesis of compound 19

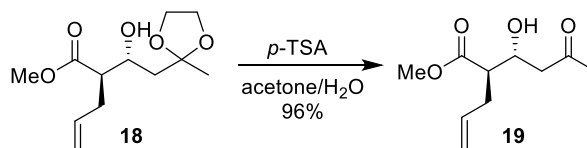

To a stirred solution of compound **18** (1.87 g, 7.66 mmol) in acetone (15 mL) and H<sub>2</sub>O (15 mL) were added *p*-TSA (728 mg, 3.83 mmol). The mixture was stirred at 4 °C for 3 h, then quenched with saturated aqueous NaHCO<sub>3</sub>, extracted with *t*-BuOMe (3 × 20 mL), dried over anhydrous Na<sub>2</sub>SO<sub>4</sub> and concentrated in vacuo. The residue was purified by flash chromatography (EtOAc/petroleum ether 1:2) to give compound **19** (1.47 g, 7.35 mmol, 96%) as a yellow oil.

**Data for 19:** *R*<sub>f</sub> = 0.43 (silica, EtOAc : petroleum ether = 1:2, stains with PMA). <sup>1</sup>H NMR (400MHz, Benzene-*d*<sub>6</sub>): δ 5.78 – 5.65 (m, 1H), 5.07 (d, *J* = 17.2 Hz, 1H), 4.97 (d, *J* = 10.4 Hz, 1H), 4.29 – 4.21 (m, 1H), 3.49 – 3.41 (m, 1H), 3.35 (s, 3H), 2.57 – 2.49 (m, 1H), 2.44 – 2.33 (m, 1H), 2.31 – 2.12 (m, 3H), 1.63 (s, 3H) ppm. <sup>13</sup>C NMR (100MHz, Benzene-*d*<sub>6</sub>): δ 207.3, 173.9, 135.6, 117.1, 68.4, 51.2, 50.9, 47.6, 33.1, 30.2 ppm. HRMS(ESI) for C<sub>10</sub>H<sub>17</sub>O<sub>4</sub><sup>+</sup> [M+H]<sup>+</sup>: calcd. 201.1121, found 201.1124. IR (neat) ν<sub>max</sub> 1721, 1437, 1365, 1242, 1199, 1168 cm<sup>-1</sup>.

### Synthesis of compound 20

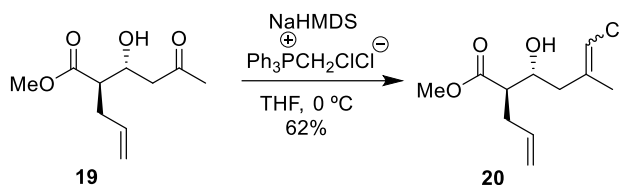

To a stirred solution of (chloromethyl)triphenylphosphonium chloride (1.41 g, 4.06 mmol) in dry tetrahydrofuran (20 mL) at 0 °C was added NaHMDS (2.03 mL, 4.06 mmol, 2.0 M solution in THF), the reaction mixture was stirred for 30 min and a solution of **19** (271 mg, 1.35 mmol) in tetrahydrofuran (5 mL) was added dropwise. After 3 h, the reaction mixture was quenched by saturated aqueous NH<sub>4</sub>Cl solution (20 mL) and the aqueous layer was extracted with *t*-BuOMe (3 × 20 mL). The combined organic layers were washed with brine (20 mL) and dried over Na<sub>2</sub>SO<sub>4</sub>. The solvent was removed by rotary evaporation to give crude product, which was purified through flash column chromatography (EtOAc/petroleum ether 1:30) to yield **20** (199 mg, 0.85 mmol, 62%) as a light-yellow oil. Compound **20** was obtained as inseparable mixture in a ratio of 7:3.



**Data for 20:**  $R_f$  = 0.75 (silica, EtOAc : petroleum ether = 1:3, stains with PMA).  **$^1\text{H}$  NMR (400MHz, Chloroform-*d*):**  $\delta$  5.92 – 5.86 (m, 1H), 5.79 – 5.68 (m, 1H), 5.14 – 5.07 (m, 1H), 5.05 (dd,  $J$  = 10.2, 1.2 Hz, 1H), 3.96 – 3.90 (m, 0.3H), 3.88 – 3.81 (m, 0.7H), 3.73 – 3.70 (m, 3H), 2.81 (d,  $J$  = 8.8 Hz, 0.3H), 2.67 (d,  $J$  = 7.6 Hz, 0.7H), 2.58 – 2.50 (m, 1H), 2.46 – 2.40 (m, 2H), 2.27 – 2.21 (m, 1H), 1.80 (d,  $J$  = 1.2 Hz, 3H) ppm.  **$^{13}\text{C}$  NMR (100MHz, Chloroform-*d*):** major isomer:  $\delta$  175.0, 135.2, 134.6, 117.7, 114.9, 69.5, 51.9, 49.9, 43.1, 33.8, 16.8 ppm. **HRMS(ESI)** for  $\text{C}_{11}\text{H}_{18}\text{ClO}_3^+$   $[\text{M}+\text{H}]^+$ : calcd. 233.0939, found 233.0940. **IR (neat)  $\nu_{\text{max}}$**  2948, 2921, 1728, 1439, 1168  $\text{cm}^{-1}$ .

### Synthesis of compound 21

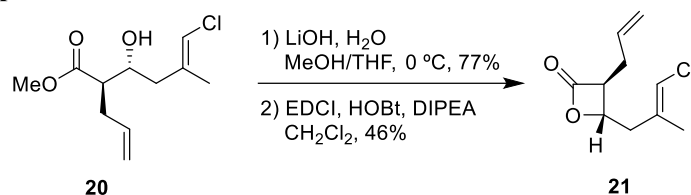

To a stirred solution of **20** (102 mg, 0.44 mmol) in MeOH (1.5 mL) and THF (3 mL) at 0 °C was added LiOH solution (1.10 mL, 4.40 mmol, 4.0 M solution in water), and the reaction mixture was stirred for 3.5 h. Then 1 mol/L HCl was added to the reaction mixture to adjust the pH below 4 and the aqueous layer was extracted with EtOAc (3  $\times$  5 mL). The combined organic layers were washed with brine (10 mL) and dried over  $\text{Na}_2\text{SO}_4$ . The solvent was removed by rotary evaporation to give a crude product, which was purified through flash column chromatography (EtOAc/petroleum ether 1:3) to yield **S3** (73 mg, 0.33 mmol, 77%) as a colorless oil.

To a stirred solution of **S3** (15 mg, 0.07 mmol) in dry  $\text{CH}_2\text{Cl}_2$  (2 mL) at 36 °C was added EDCI (16 mg, 0.08 mmol), and HOBT (14 mg, 0.10 mmol). After 1 h, DIPEA (14  $\mu\text{L}$ , 0.07 mmol) was added to the reaction. After 4 h, the reaction was quenched with saturated aqueous  $\text{NH}_4\text{Cl}$  solution (5 mL) and the aqueous layer was extracted with *t*-BuOMe (3  $\times$  10 mL). The combined organic layers were washed with brine (10 mL) and dried over  $\text{Na}_2\text{SO}_4$ . The solvent was removed by rotary evaporation to give the crude product, which was purified through flash column chromatography (EtOAc/petroleum ether 1:20) to yield **21** (6.1 mg, 0.03 mmol, 46%) as a yellow oil. Compound **21** was isolated as single diastereoisomer.

**Data for 21:**  $R_f$  = 0.89 (silica, EtOAc : petroleum ether = 1:2, stains with PMA).  **$^1\text{H}$  NMR (400MHz, Chloroform-*d*):**  $\delta$  5.98 – 5.93 (m, 1H), 5.80 – 5.68 (m, 1H), 5.20 – 5.16 (m, 1H), 5.16 – 5.13 (m, 1H), 4.39 – 4.32 (m, 1H), 3.36 – 3.30 (m, 1H), 2.67 – 2.46 (m, 4H), 1.83 (d,  $J$  = 1.6 Hz, 3H) ppm.

## Synthesis of compound **22**

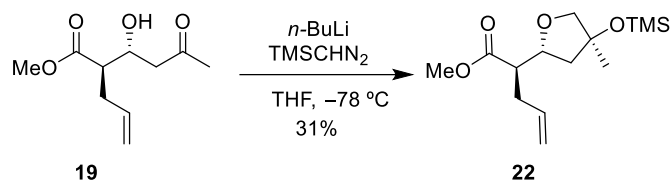

To a stirred solution of TMSCHN<sub>2</sub> (0.21 mL, 0.42 mmol) in dry THF (2 mL) at  $-78\text{ }^\circ\text{C}$  was added *n*-BuLi (0.26 mL, 0.42 mmol, 1.6 M solution in hexanes) and the reaction mixture was stirred for 10 min. Then a solution of **19** (47 mg, 0.23 mmol) in THF (1 mL) was added dropwise. After 4 h stirring at  $-78\text{ }^\circ\text{C}$ , the reaction mixture was quenched by 1 mol/L HCl solution (3 mL) and the aqueous layer was extracted with *t*-BuOMe ( $3 \times 5$  mL). The combined organic layers were washed with brine (20 mL) and dried over Na<sub>2</sub>SO<sub>4</sub>. The solvent was removed by rotary evaporation to give crude product, which was purified through flash column chromatography (EtOAc/petroleum ether 1:40) to yield **22** (20.4 mg, 0.07 mmol, 31%) as a light-yellow oil.

**Data for 22:** *R<sub>f</sub>* = 0.40 (silica, EtOAc : petroleum ether = 1:40, stains with PMA). **<sup>1</sup>H NMR (400MHz, Chloroform-*d*):**  $\delta$  5.78 – 6.66 (m, 1H), 5.06 (dd, *J* = 17.2, 1.6 Hz, 1H), 5.00 (d, *J* = 9.6 Hz, 1H), 4.31 (ddd, *J* = 10.0, 8.4, 6.0 Hz, 1H), 3.73 (d, *J* = 9.2 Hz, 1H), 3.69 (s, 3H), 3.63 (d, *J* = 9.2 Hz, 1H), 2.55 (ddd, *J* = 10.4, 8.4, 4.4 Hz, 1H), 2.38 – 2.28 (m, 1H), 2.22 – 2.14 (m, 1H), 2.10 (dd, *J* = 12.6, 6.8 Hz, 1H), 1.53 (dd, *J* = 12.4, 10.0 Hz, 1H), 1.40 (s, 3H), 0.12 (s, 9H) ppm. **<sup>13</sup>C NMR (100MHz, Chloroform-*d*):**  $\delta$  174.1, 134.9, 117.1, 80.9, 80.4, 79.9, 51.8, 51.5, 46.3, 33.3, 26.1, 2.3 ppm.

The relative stereochemistry of compound **22** was determined through 2D NMR. From the NOESY, the nucleophilic attack from *Re* face was directed by the hydroxy group.

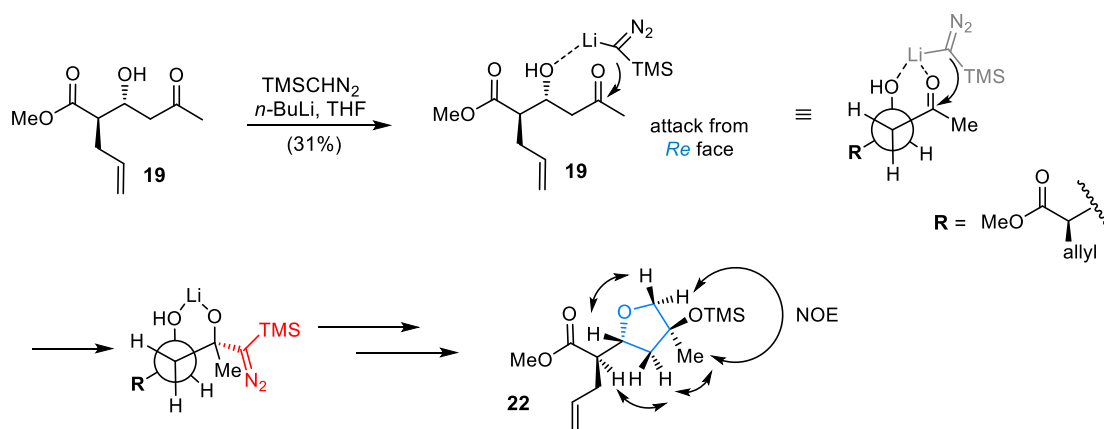

### Synthesis of compound 23

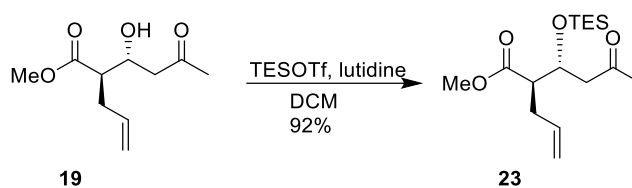

To a stirred solution of **19** (36 mg, 0.18 mmol) in CH<sub>2</sub>Cl<sub>2</sub> (2 mL) at 0 °C was added 2,6-lutidine (32 μL, 0.27 mmol) and TESOTf (53 μL, 0.23 mmol), and the reaction mixture was stirred for 2 h. Then, the reaction mixture was quenched by saturated aqueous NH<sub>4</sub>Cl solution (5 mL) and the aqueous layer was extracted with EtOAc (3 × 5 mL). The combined organic layers were washed with brine (10 mL) and dried over Na<sub>2</sub>SO<sub>4</sub>. The solvent was removed by rotary evaporation to give the crude product, which was purified through flash column chromatography (EtOAc/petroleum ether 1:30) to yield **23** (49 mg, 0.17 mmol, 92%) as a light-yellow oil.

**Data for 23:** *R*<sub>f</sub> = 0.81 (silica, EtOAc : petroleum ether = 1:4, stains with PMA). <sup>1</sup>H NMR (400MHz, Chloroform-*d*): δ 5.78 – 5.67 (m, 1H), 5.05 (dd, *J* = 17.2, 1.6 Hz, 1H), 4.99 (d, *J* = 10.4 Hz, 1H), 4.47 (q, *J* = 5.6 Hz, 1H), 3.65 (s, 3H), 2.65 – 2.59 (m, 3H), 2.42 – 2.27 (m, 2H), 2.15 (s, 3H), 0.92 (t, *J* = 8.0 Hz, 9H), 0.58 (q, *J* = 7.6 Hz, 6H) ppm. <sup>13</sup>C NMR (100MHz, Chloroform-*d*): δ 206.8, 173.2, 135.7, 116.5, 68.6, 51.8, 51.5, 48.0, 31.4, 30.9, 6.8, 4.8 ppm.

### Synthesis of compound 24

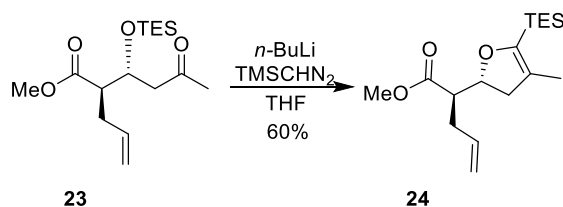

To a stirred solution of TMSCHN<sub>2</sub> (80 μL, 0.16 mmol) in dry THF (1.5 mL) at –78 °C was added *n*-BuLi (0.10 mL, 0.16 mmol, 1.6 M solution in hexanes) and the reaction mixture was stirred for 10 min. Then, a solution of **23** (28 mg, 0.09 mmol) in THF (1 mL) was added dropwise. After 4 h at –78 °C, the reaction mixture was quenched by 1 mol/L HCl solution (2 mL) and the aqueous layer was extracted with *t*-BuOMe (3 × 5 mL). The combined organic layers were washed with brine (20 mL) and dried over Na<sub>2</sub>SO<sub>4</sub>. The solvent was removed by rotary evaporation to give the crude product, which was purified through flash column chromatography (EtOAc/petroleum ether 1:80) to yield **24** (17 mg, 0.05 mmol, 60%) as a light-yellow oil.

**Data for 24:**  $R_f$  = 0.71 (silica, EtOAc : petroleum ether = 1:20, stains with PMA).  $^1\text{H}$  NMR (400MHz, Chloroform-*d*):  $\delta$  5.80 – 5.68 (m, 1H), 5.06 (dd,  $J$  = 17.2, 1.6 Hz, 1H), 5.00 (d,  $J$  = 10.0 Hz, 1H), 4.56 (ddd,  $J$  = 10.0, 8.4, 6.8 Hz, 1H), 3.65 (s, 3H), 2.72 – 2.58 (m, 2H), 2.39 – 2.29 (m, 2H), 2.25 – 2.16 (m, 1H), 1.69 (s, 3H), 0.94 (t,  $J$  = 8.0 Hz, 9H), 0.64 (q,  $J$  = 8.0 Hz, 6H) ppm.  $^{13}\text{C}$  NMR (100MHz, Chloroform-*d*):  $\delta$  173.8, 150.8, 135.1, 120.7, 116.7, 80.7, 51.4, 51.1, 40.5, 32.4, 12.2, 7.3, 3.1 ppm.

### Synthesis of compound 25

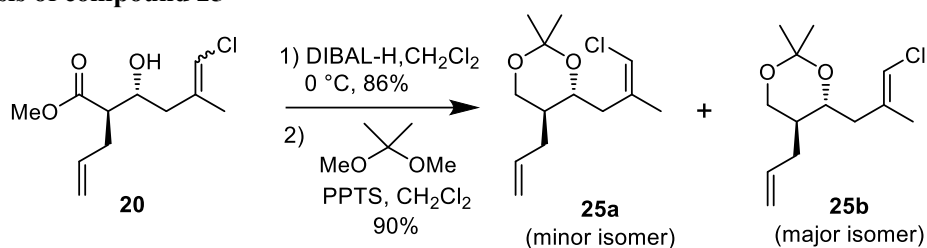

To a stirred solution of alcohol **20** (1.06 g, 4.56 mmol) in dry  $\text{CH}_2\text{Cl}_2$  (40 mL) at 0 °C was added DIBAL-H (9.13 mL, 9.13 mmol, 1.0 M solution in hexane) under argon. After 4 h, the mixture was quenched by MeOH (3 mL) and then saturated Rochelle's salt solution (30 mL) was added, and the reaction mixture was stirred vigorously for 2 h at room temperature until the two layers were clear. The aqueous phase was extracted with *t*-BuOMe (3  $\times$  30 mL), the combined organic layers were washed with brine, dried over anhydrous  $\text{Na}_2\text{SO}_4$  and concentrated under reduced pressure. Afterwards, the residue was purified through flash column chromatography (EtOAc/petroleum ether 1:6 to 1:3 to 1:2) to yield **S2** (793 mg, 3.93 mmol, 86%) as a colorless oil.

To a stirred solution of **S2** (793 mg, 3.93 mmol) in  $\text{CH}_2\text{Cl}_2$  (40 mL) at 13 °C was added 2,2-dimethoxypropane (1.5 mL, 11.80 mmol) and pyridinium *p*-toluenesulfonate (494 mg, 1.97 mmol) and the reaction mixture was stirred for 4 h. Afterwards the mixture was directly concentrated for column chromatography separation (eluent EtOAc/petroleum ether 1:50) to yield **25** (870.7 mg, 3.56 mmol, 90%) as a colorless oil. An analytically pure sample of **25a** and **25b** was obtained from preparative TLC (EtOAc/petroleum ether 1:60).

**Data for 25a: Minor isomer**  $R_f$  = 0.28 (silica, EtOAc : petroleum ether = 1:30, stains with PMA).  $^1\text{H}$  NMR (400MHz, Chloroform-*d*):  $\delta$  5.83 (s, 1H), 5.78 – 5.67 (m, 1H), 5.09 – 5.00 (m, 2H), 3.81 – 3.72 (m, 2H), 3.56 (t,  $J$  = 11.6 Hz, 1H), 2.65 (dd,  $J$  = 14.0, 2.8 Hz, 1H), 2.28 – 2.20 (m, 2H), 1.91 – 1.84 (m, 1H), 1.82 (s, 3H), 1.73 – 1.63 (m, 1H), 1.38 (s, 3H), 1.35 (s, 3H) ppm.  $^{13}\text{C}$  NMR (100MHz, Chloroform-*d*):  $\delta$  137.3, 135.2, 117.1, 112.6, 98.1, 72.6, 63.9, 38.7, 35.8, 33.1, 29.4,

22.6, 19.5 ppm. **IR (neat)**  $\nu_{\max}$  2990, 2922, 2858, 1378, 1199, 1168, 1124, 1055, 915  $\text{cm}^{-1}$ .

**Data for 25b:** Major isomer  $R_f = 0.23$  (silica, EtOAc : petroleum ether = 1:30, stains with PMA).

**$^1\text{H}$  NMR (400MHz, Chloroform-*d*):**  $\delta$  5.84 (s, 1H), 5.74 – 5.63 (m, 1H), 5.07 – 5.04 (m, 1H), 5.02 (s, 1H), 3.77 (dd,  $J = 12.0, 5.2$  Hz, 1H), 3.71 – 3.64 (m, 1H), 3.55 (dd,  $J = 11.8, 10.8$  Hz, 1H), 2.38 (d,  $J = 14.0$  Hz, 1H), 2.19 – 2.10 (m, 2H), 1.88 – 1.81 (m, 1H), 1.80 (s, 3H), 1.71 – 1.60 (m, 1H), 1.39 (s, 3H), 1.35 (s, 3H) ppm.  **$^{13}\text{C}$  NMR (100MHz, Chloroform-*d*):**  $\delta$  135.9, 134.9, 117.2, 113.7, 98.3, 71.7, 63.8, 40.6, 38.3, 33.1, 29.4, 19.4, 17.2 ppm. **HRMS(ESI)** for  $\text{C}_{13}\text{H}_{22}\text{ClO}_2^+ [\text{M}+\text{H}]^+$ : calcd. 245.1303, found 245.1302. **IR (neat)**  $\nu_{\max}$  2990, 2921, 2854, 1376, 1263, 1200, 1165, 1128  $\text{cm}^{-1}$ .

The olefin configuration of **25b** was determined through NOESY.

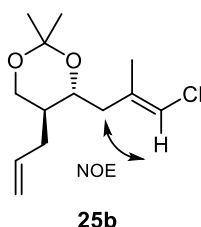

#### Synthesis of compound 27

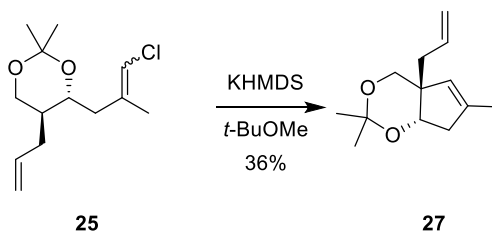

To a stirred solution of **25** (100 mg, 0.41 mmol) in *t*-BuOMe (4 mL) at 4 °C was added KHMDS (2.05 mL, 2.05 mmol, 1.0 M solution in THF) at a rate of 0.034 mm/min by a syringe pump. The reaction mixture was stirred for 3 h, then quenched by saturated aqueous  $\text{NH}_4\text{Cl}$  solution (5 mL), and the aqueous layer was extracted with *t*-BuOMe (3  $\times$  5 mL). The combined organic layers were washed with brine (10 mL) and dried over  $\text{Na}_2\text{SO}_4$ . The solvent was removed by rotary evaporation to give the crude product, which was purified through flash column chromatography (EtOAc/petroleum ether 1:100 to 1:80) to yield **27** (30 mg, 0.15 mmol, 36%) as a colorless oil.

**Data for 27:**  $R_f = 0.49$  (silica, EtOAc : petroleum ether = 1:30, stains with PMA).  **$^1\text{H}$  NMR (400MHz, Chloroform-*d*):**  $\delta$  5.77 – 5.66 (m, 1H), 5.12 – 5.00 (m, 3H), 4.03 (d,  $J = 6.4$  Hz, 1H), 3.56 – 3.49 (m, 2H), 2.68 – 2.59 (m, 1H), 2.26 – 2.12 (m, 3H), 1.76 (s, 3H), 1.39 (s, 3H), 1.32 (s, 3H) ppm.  **$^{13}\text{C}$  NMR (100MHz, Chloroform-*d*):**  $\delta$  140.2, 134.6, 126.7, 117.5, 98.8, 76.1, 64.6, 54.3, 43.6, 40.7, 26.1, 22.8, 16.6 ppm. **HRMS(ESI)** for  $\text{C}_{10}\text{H}_{17}\text{O}_2^+ [\text{M}+\text{H}]^+$ : calcd. 209.1536, found 209.1537. **IR (neat)**  $\nu_{\max}$  2925, 2860, 1375, 1226, 1195, 1081  $\text{cm}^{-1}$ .

### Synthesis of compound 28

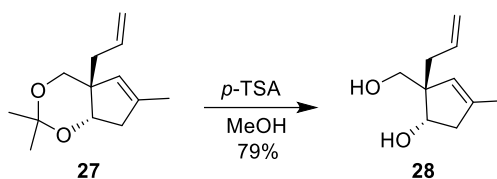

To a stirred solution of **27** (38 mg, 0.18 mmol) in MeOH (2 mL) at 13 °C was added *p*-TSA (34.7 mg, 0.18 mmol) and the reaction mixture was stirred for 5 h. The reaction mixture was quenched by saturated aqueous NaHCO<sub>3</sub> solution (5 mL) and the aqueous layer was extracted with EtOAc (3 × 5 mL). The combined organic layers were washed with brine (10 mL) and dried over Na<sub>2</sub>SO<sub>4</sub>. The solvent was removed by rotary evaporation to give crude product, which was purified through flash column chromatography (EtOAc/petroleum ether 1:4 to 1:2 to 1:1) to yield **28** (24 mg, 0.14 mmol, 79%) as a colorless oil.

**Data for 28:** *R*<sub>f</sub> = 0.23 (silica, EtOAc : petroleum ether = 1:2, stains with PMA). <sup>1</sup>H NMR (400MHz, Chloroform-*d*): δ 5.83 – 5.71 (m, 1H), 5.11 – 5.01 (m, 3H), 4.27 (dd, *J* = 7.8, 5.6 Hz, 1H), 3.67 (d, *J* = 11.2 Hz, 1H), 3.62 (d, *J* = 11.2 Hz, 1H), 2.63 (dd, *J* = 16.8, 7.6 Hz, 1H), 2.29 (s, 2H), 2.27 – 2.20 (m, 2H), 2.12 (dd, *J* = 13.8, 8.0 Hz, 1H), 1.73 (s, 3H) ppm. <sup>13</sup>C NMR (100MHz, Chloroform-*d*): δ 140.6, 134.9, 127.0, 117.7, 78.9, 65.9, 56.1, 46.3, 40.2, 17.2 ppm. HRMS(ESI) for C<sub>13</sub>H<sub>21</sub>O<sub>2</sub><sup>+</sup> [M+H]<sup>+</sup>: calcd. 169.1223, found 169.1224. IR (neat) ν<sub>max</sub> 3382, 2968, 2925, 1713, 1440, 1071, 1034, 1001, 917 cm<sup>-1</sup>.

### Synthesis of compound 29

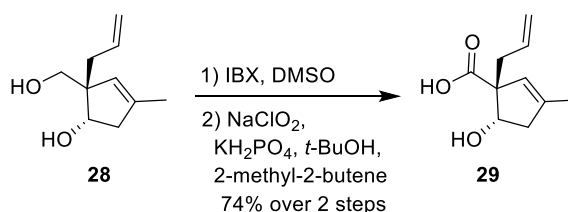

To a stirred solution of **28** (13 mg, 0.077 mmol) in DMSO (1 mL) at 19 °C was added IBX (43 mg, 0.15 mmol), the reaction mixture was stirred for 1 h and then quenched by saturated aqueous NaHCO<sub>3</sub> solution (5 mL). The aqueous layer was extracted with *t*-BuOMe (3 × 5 mL), then the combined organic layers were washed with brine (10 mL), dried over Na<sub>2</sub>SO<sub>4</sub> and the solvent was removed to afford the crude aldehyde which was directly used in the next step.

\*Use of the crude aldehyde is necessary due to its instability and it will partly decompose during flash column chromatography.

To a stirred solution of the above aldehyde intermediate in *t*-BuOH (1 mL) at 19 °C was added 2-methyl-2-butene (0.16 mL, 1.48 mmol), saturated aqueous KH<sub>2</sub>PO<sub>4</sub> solution (0.2 mL) and NaClO<sub>2</sub> (34 mg, 0.37 mmol). The reaction mixture was stirred for 5 h and then the reaction mixture was diluted by EtOAc (3 mL) followed by addition of 1 mol/L HCl solution to adjust the pH of the organic phase below 3. After extracted with EtOAc (3 × 10 mL), the combined organic layers were washed with brine (10 mL) and dried over Na<sub>2</sub>SO<sub>4</sub>. The solvent was removed by rotary evaporation to give the crude product, which was purified through flash column chromatography (EtOAc/petroleum ether 1:1) to yield **29** (10 mg, 0.057 mmol, 74% over 2 steps) as a colorless oil. **29** was directly subjected to next step.

### Synthesis of compound **13**

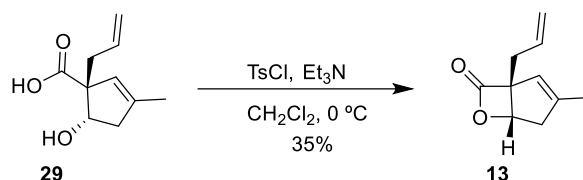

To a stirred solution of **29** (21 mg, 0.12 mmol) in dry CH<sub>2</sub>Cl<sub>2</sub> (1.5 mL) at 0 °C was added Et<sub>3</sub>N (48 μL, 0.33 mmol) and TsCl (24 mg, 0.13 mmol). After 1.5 h, the reaction mixture was diluted with CH<sub>2</sub>Cl<sub>2</sub> (4 mL) and quenched with water (5 mL). The aqueous phase was extracted with *t*-BuOMe (3 × 10 mL). The combined organic phases were dried over anhydrous sodium sulfate, concentrated and purified through flash column chromatography (EtOAc/petroleum ether 1:40) to afford compound **13** (6.6 mg, 0.04 mmol, 35%) as a yellow oil.

**Data for 13:** *R*<sub>f</sub> = 0.78 (silica, EtOAc : petroleum ether = 1:4, stains with PMA). **<sup>1</sup>H NMR (400MHz, Chloroform-*d*):** δ 5.83 – 5.71 (m, 1H), 5.34 – 5.30 (m, 1H), 5.19 – 5.11 (m, 2H), 4.80 – 4.76 (m, 1H), 2.66 (s, 2H), 2.64 – 2.58 (m, 1H), 2.53 – 2.46 (m, 1H), 1.82 – 1.79 (m, 3H) ppm. **<sup>13</sup>C NMR (100MHz, Chloroform-*d*):** δ 173.3, 143.7, 132.3, 122.2, 119.0, 79.1, 74.8, 41.5, 33.7, 16.8 ppm. **HRMS(ESI)** for C<sub>10</sub>H<sub>13</sub>O<sub>2</sub><sup>+</sup> [M+H]<sup>+</sup>: calcd. 165.0910, found 165.0915. **IR (neat)** ν<sub>max</sub> 2927, 1820, 1639, 1401, 1113, 1018, 836 cm<sup>-1</sup>.

### 3. $^1\text{H}$ and $^{13}\text{C}$ NMR spectra

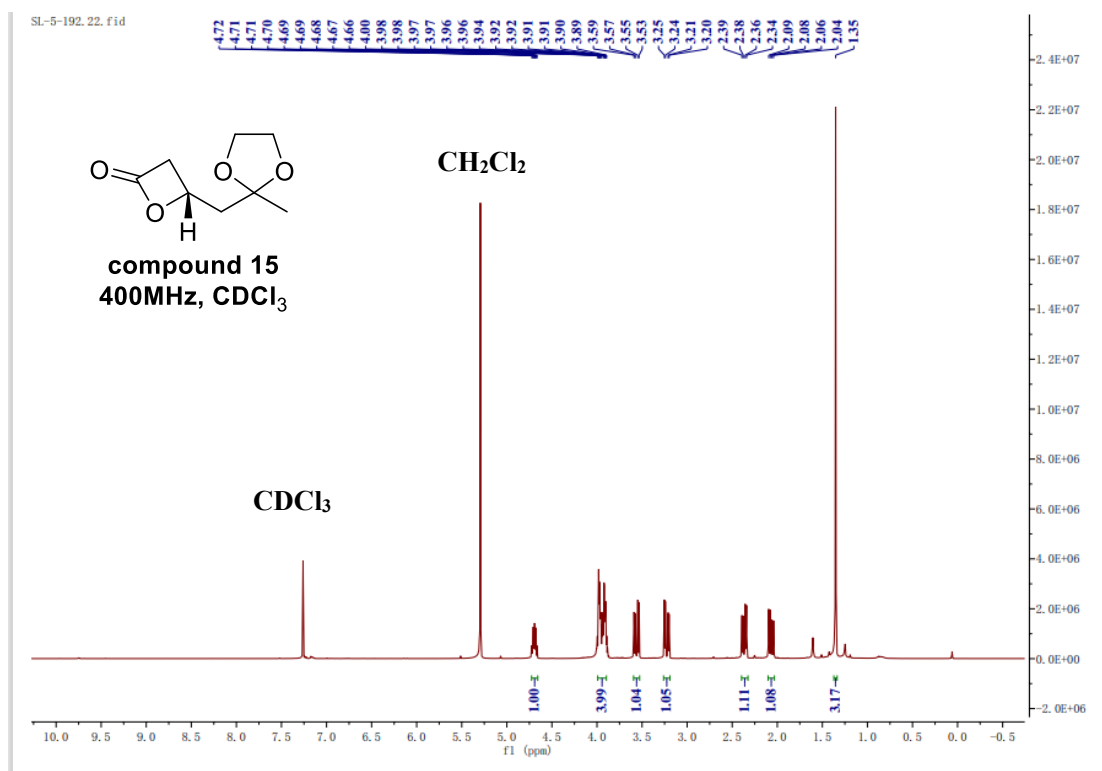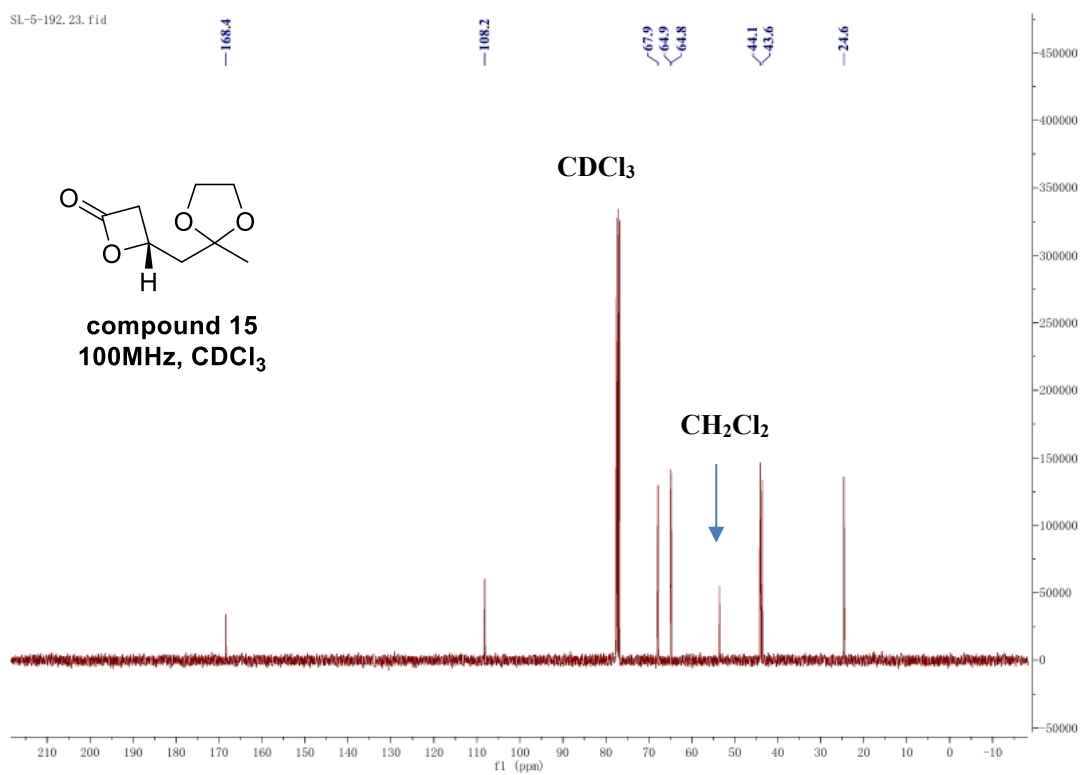



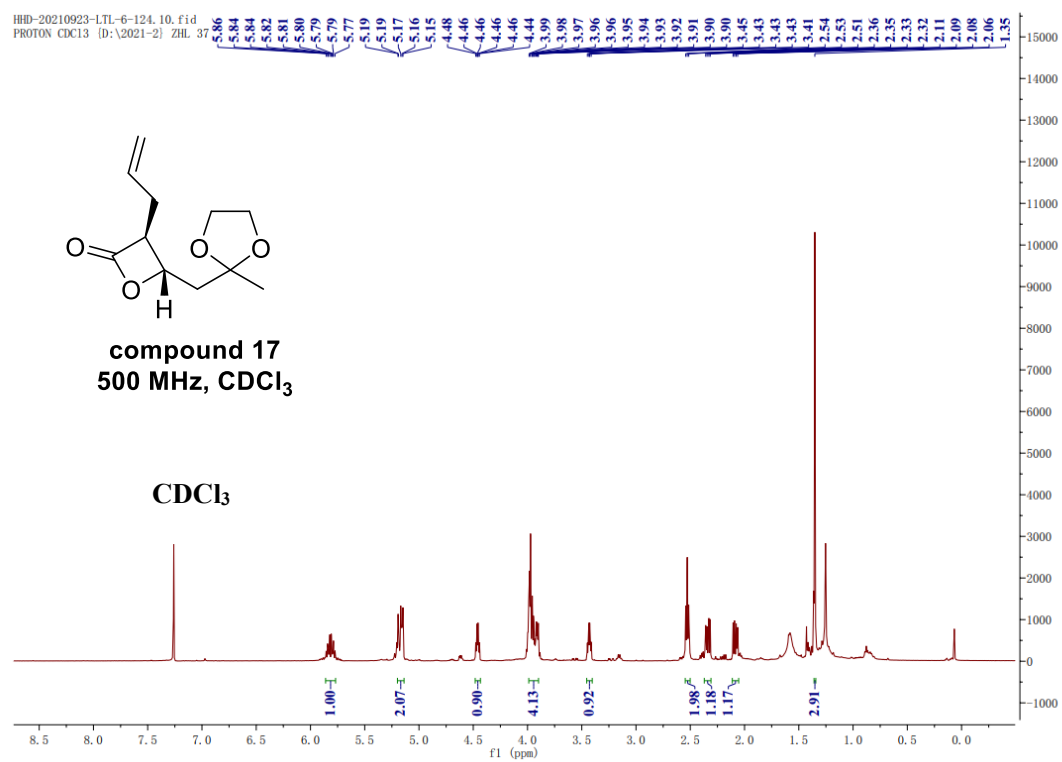

s1-5-22.10.fid

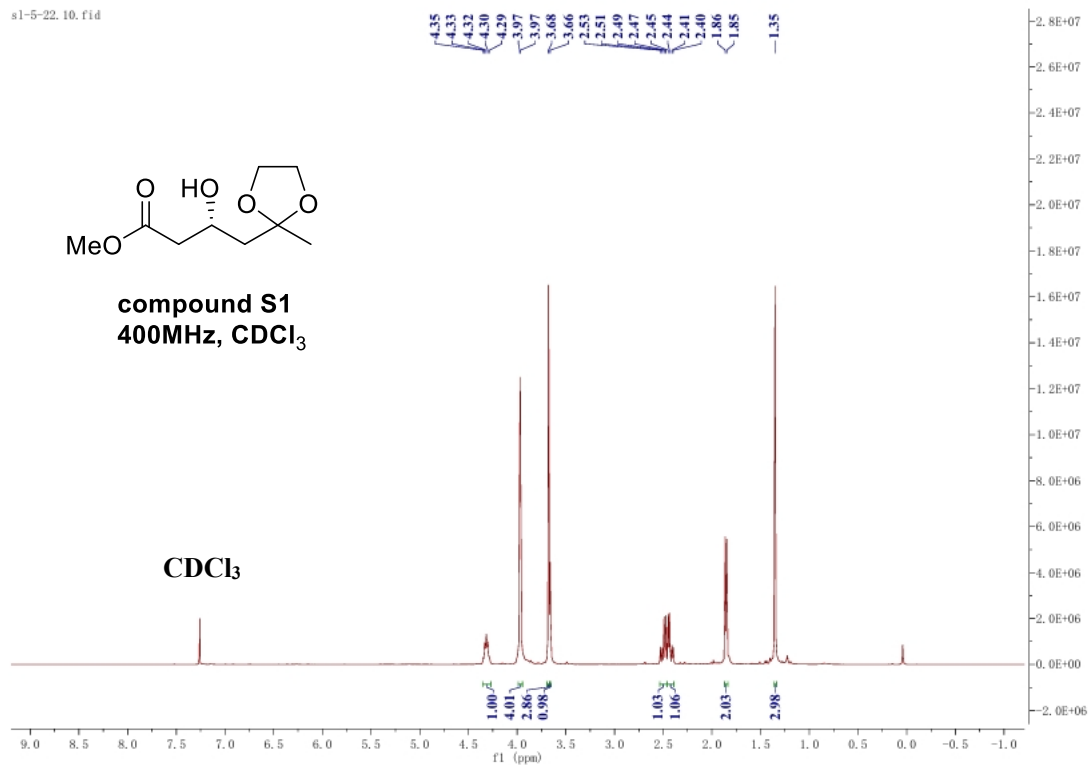

s1-5-22.11.fid

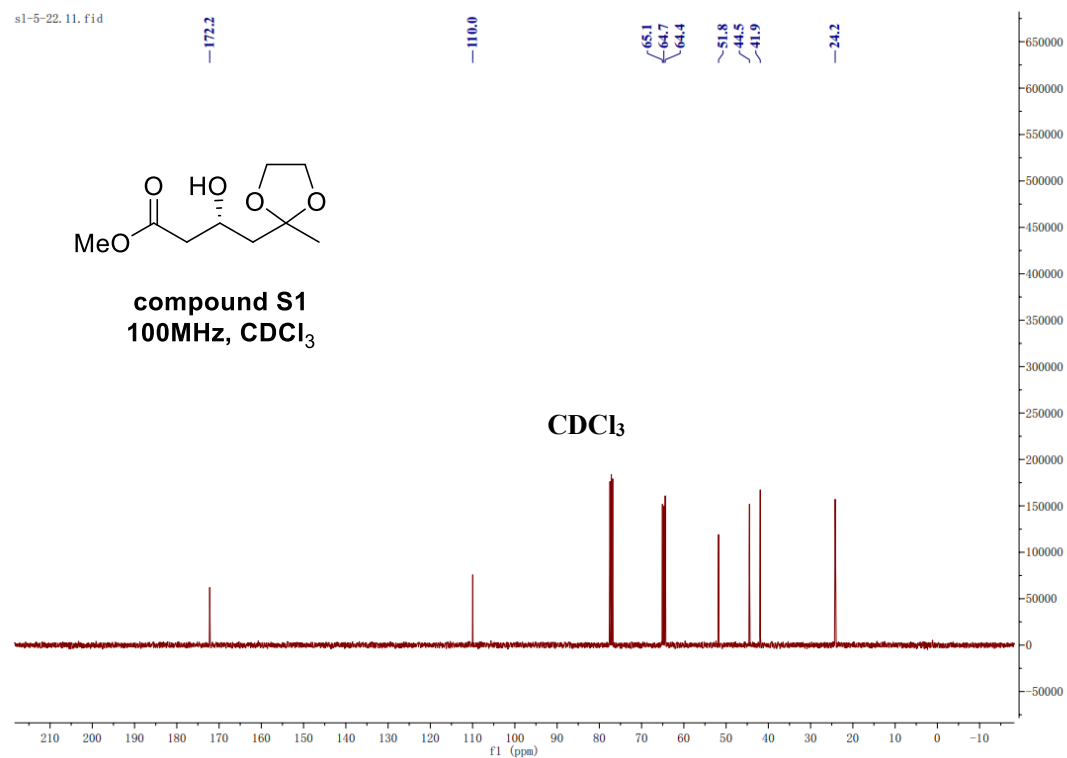

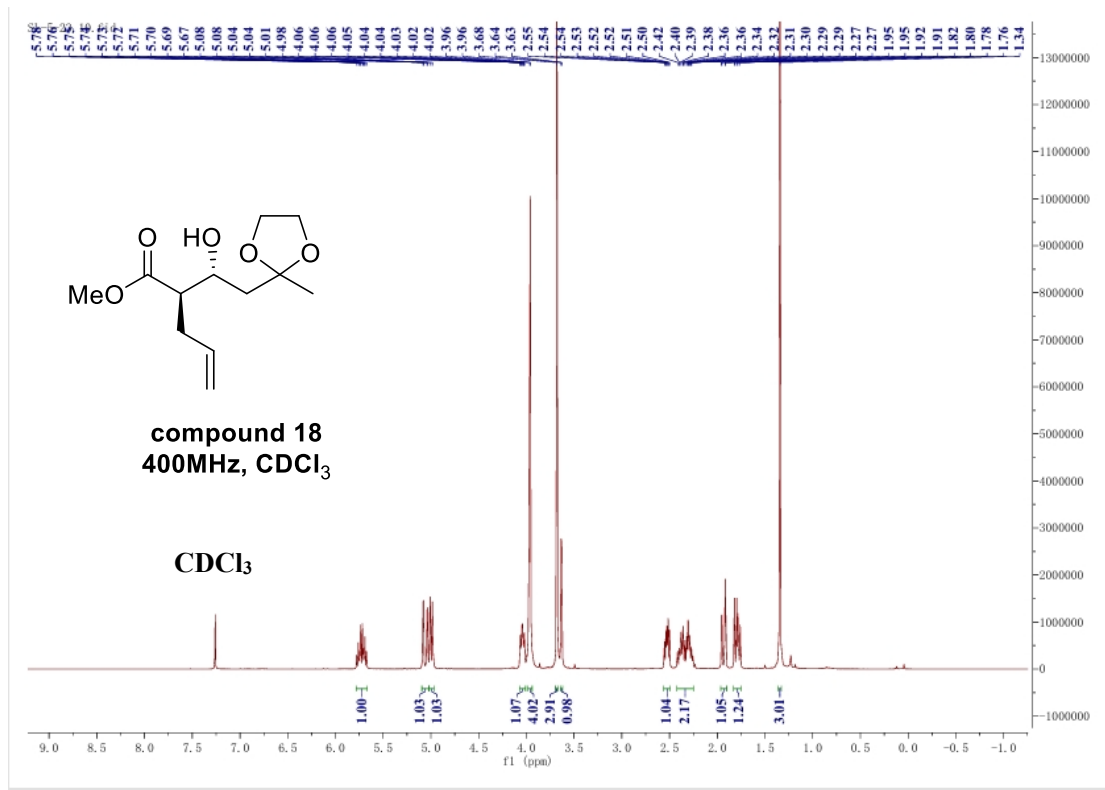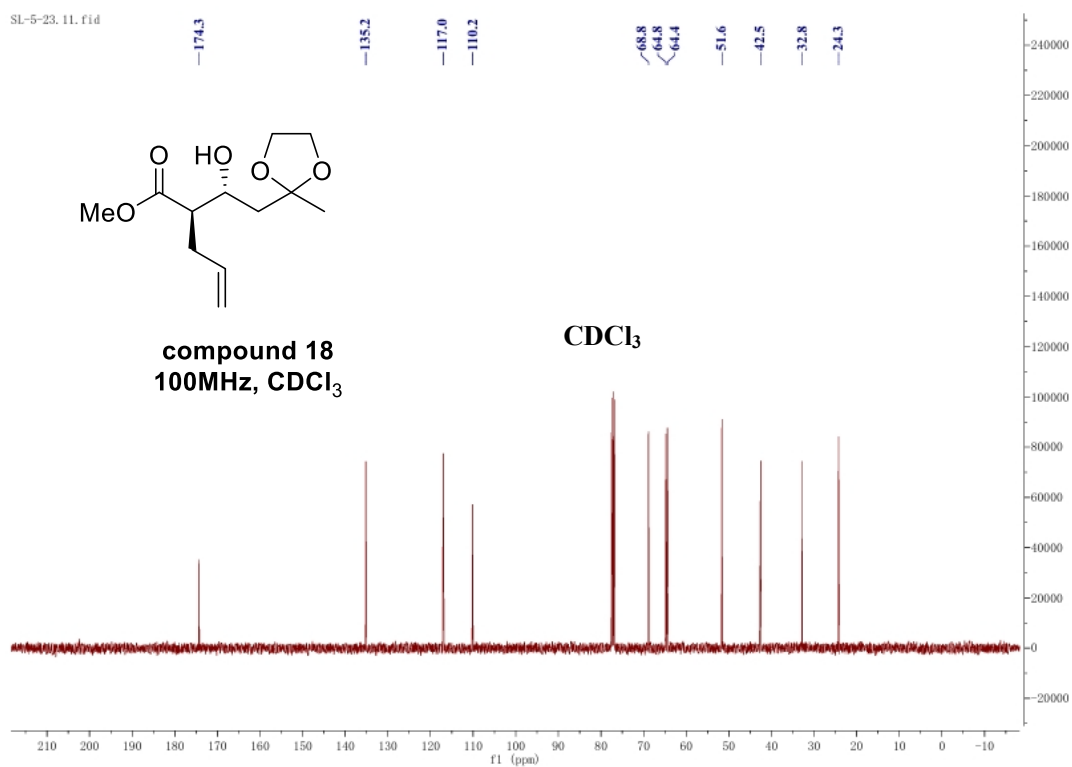

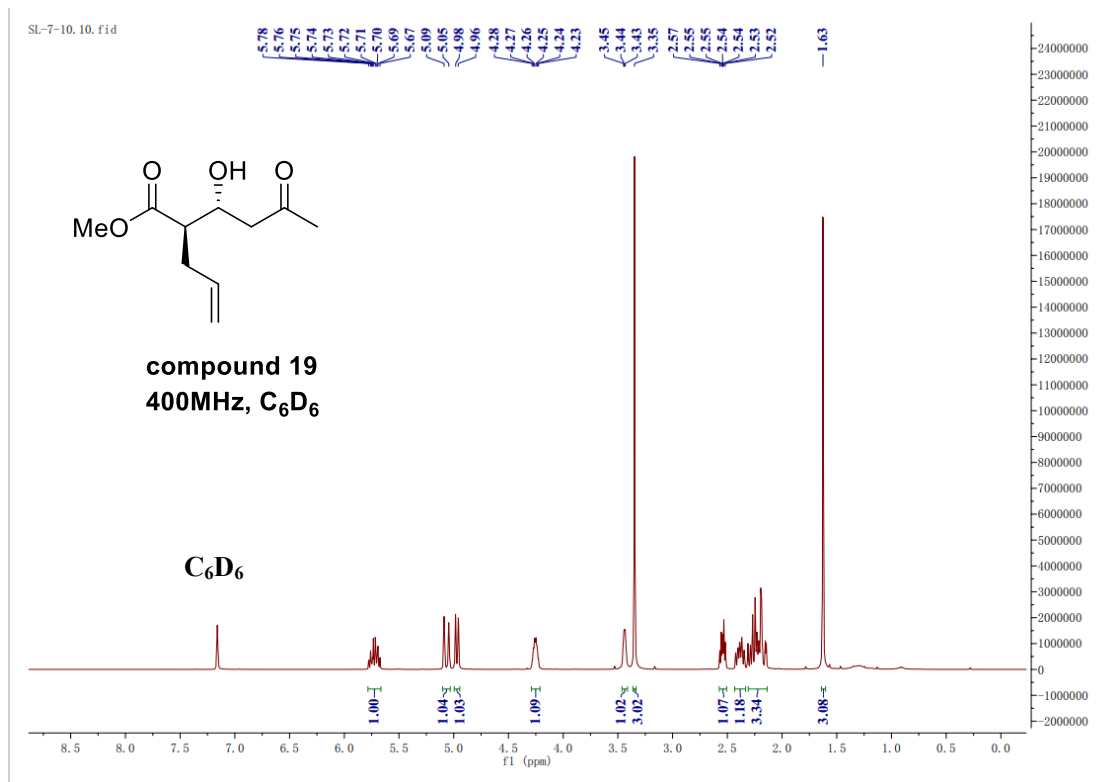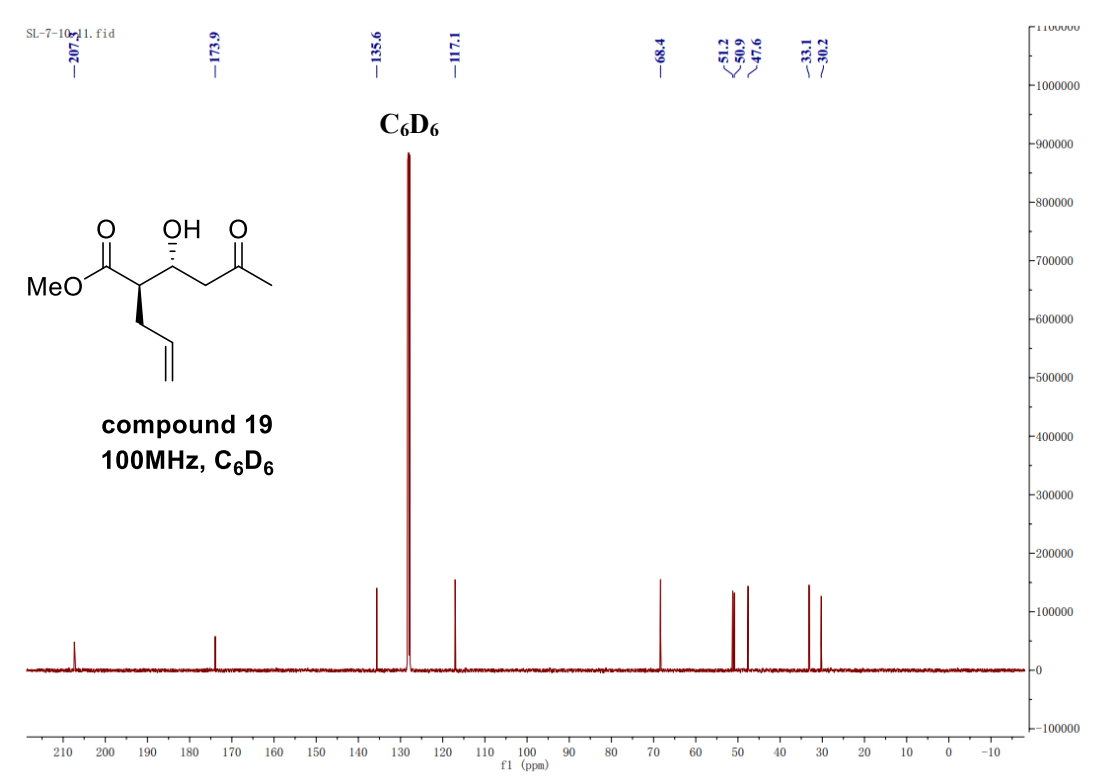

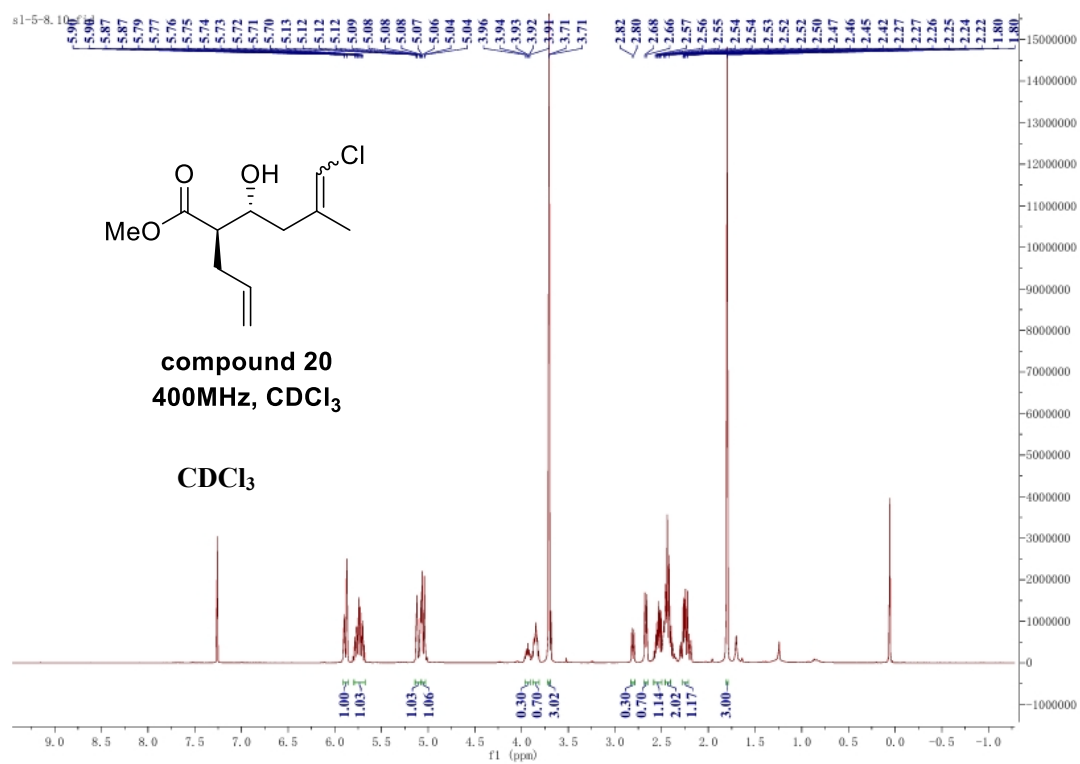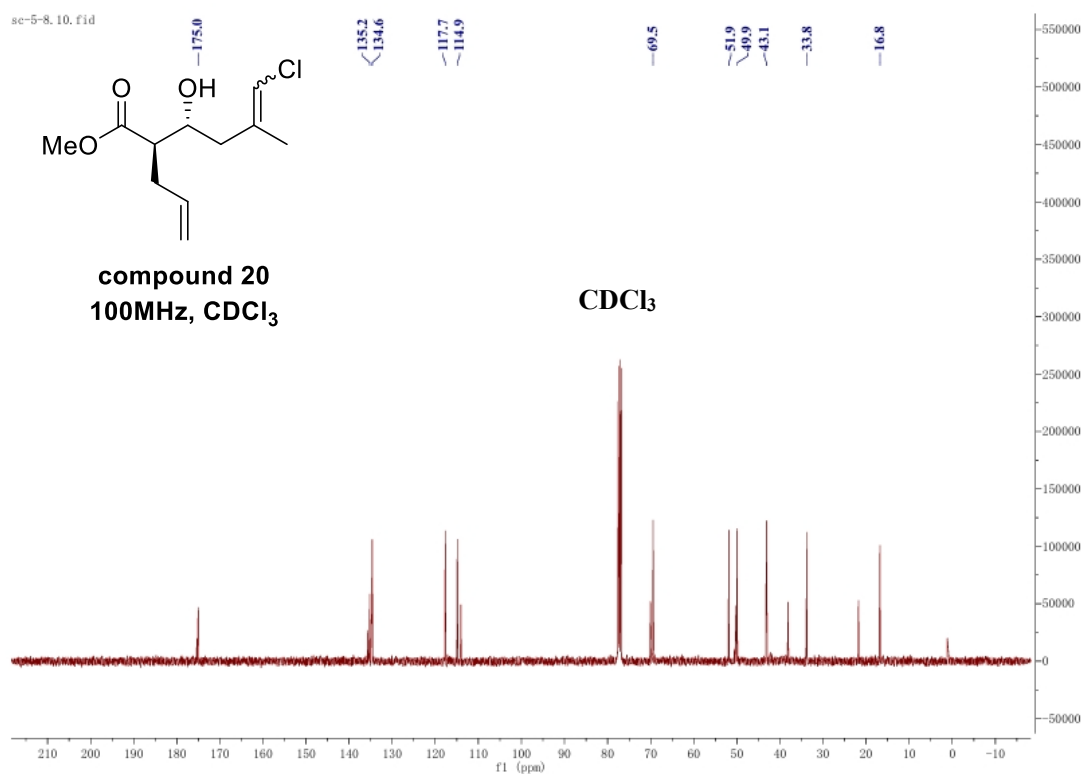

SL-5-89B.10.f1d

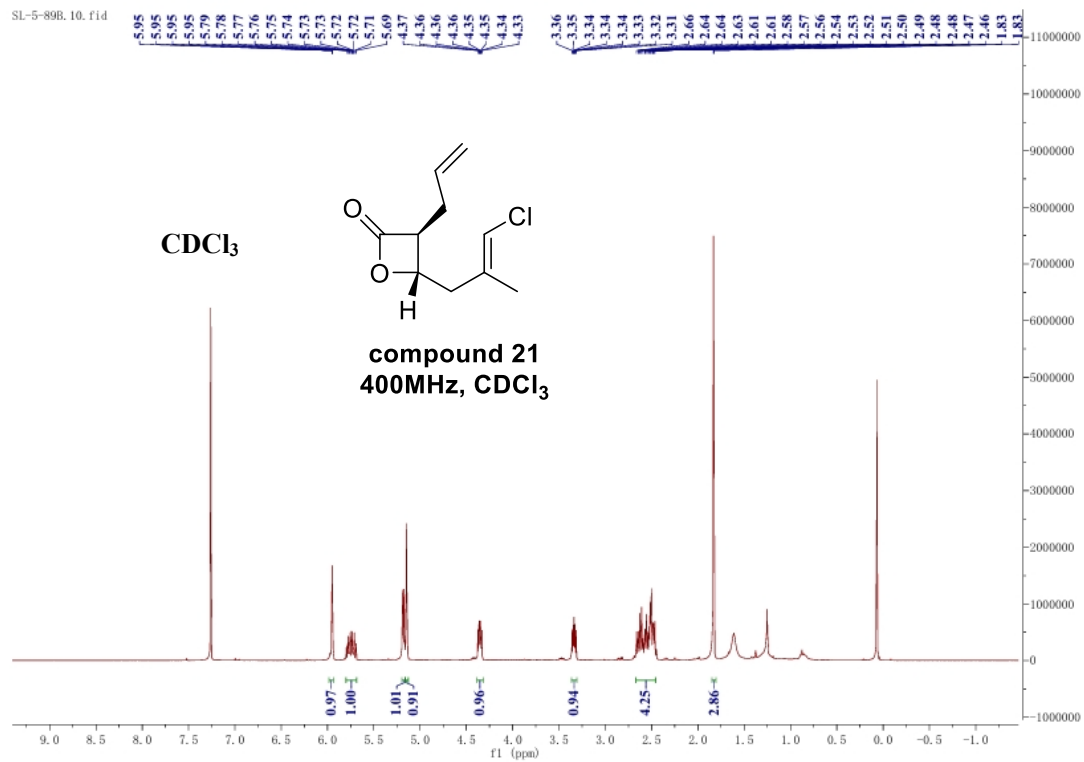

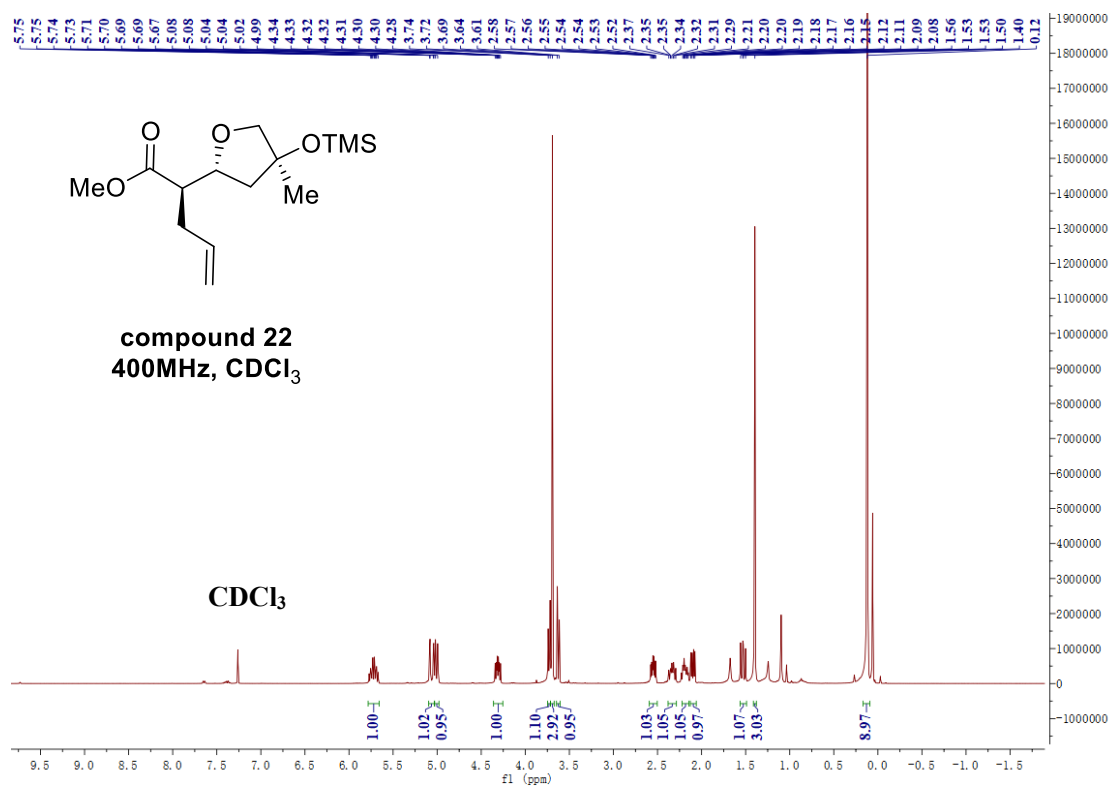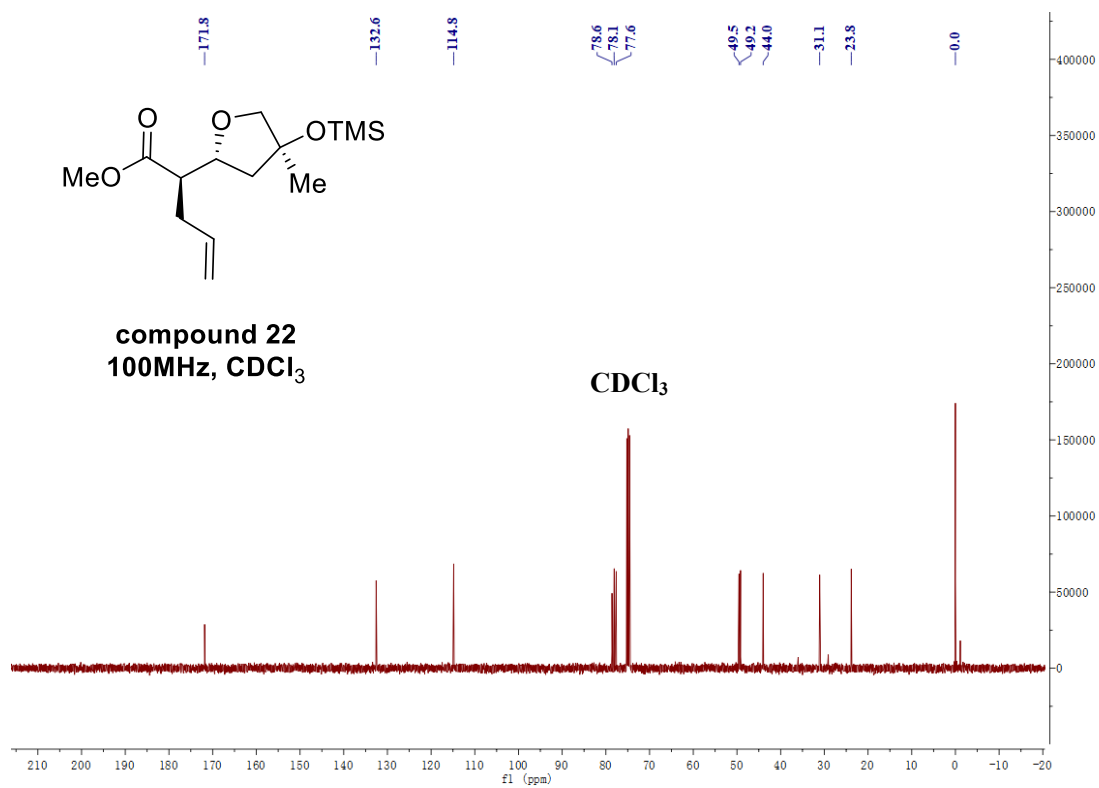

SL-15-149B.21.fid  
 C13DEPT135 CDC13 (\\192.168.1.100\nmrdata\haohongdong) test 12

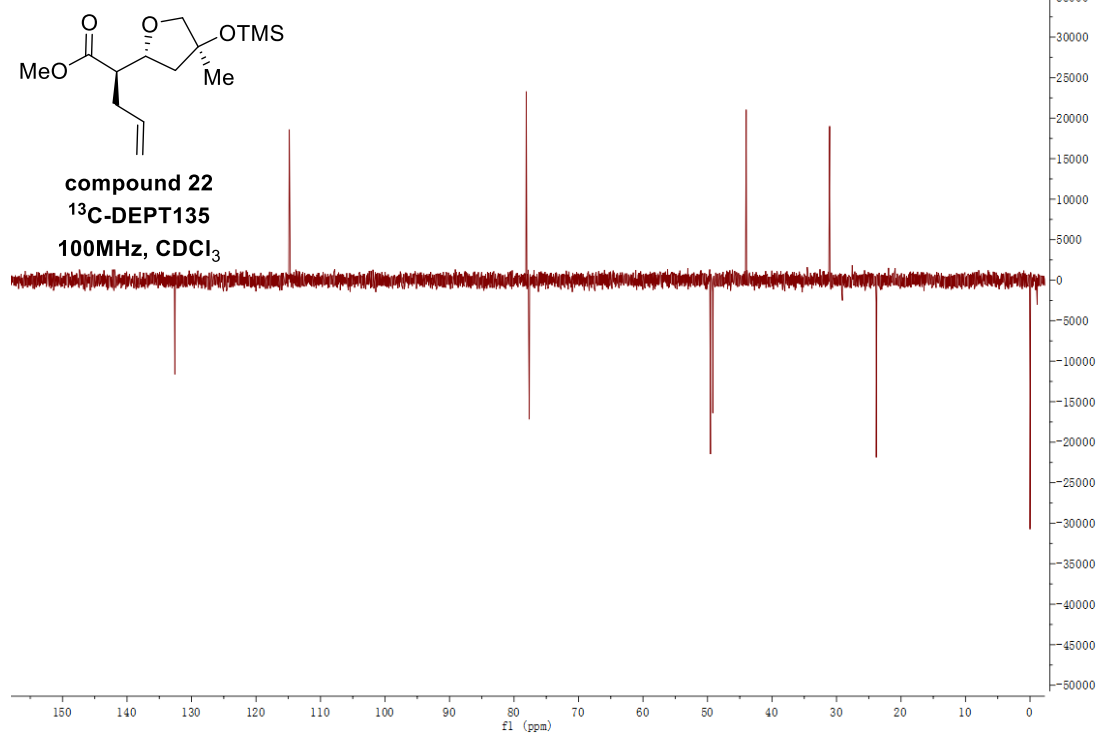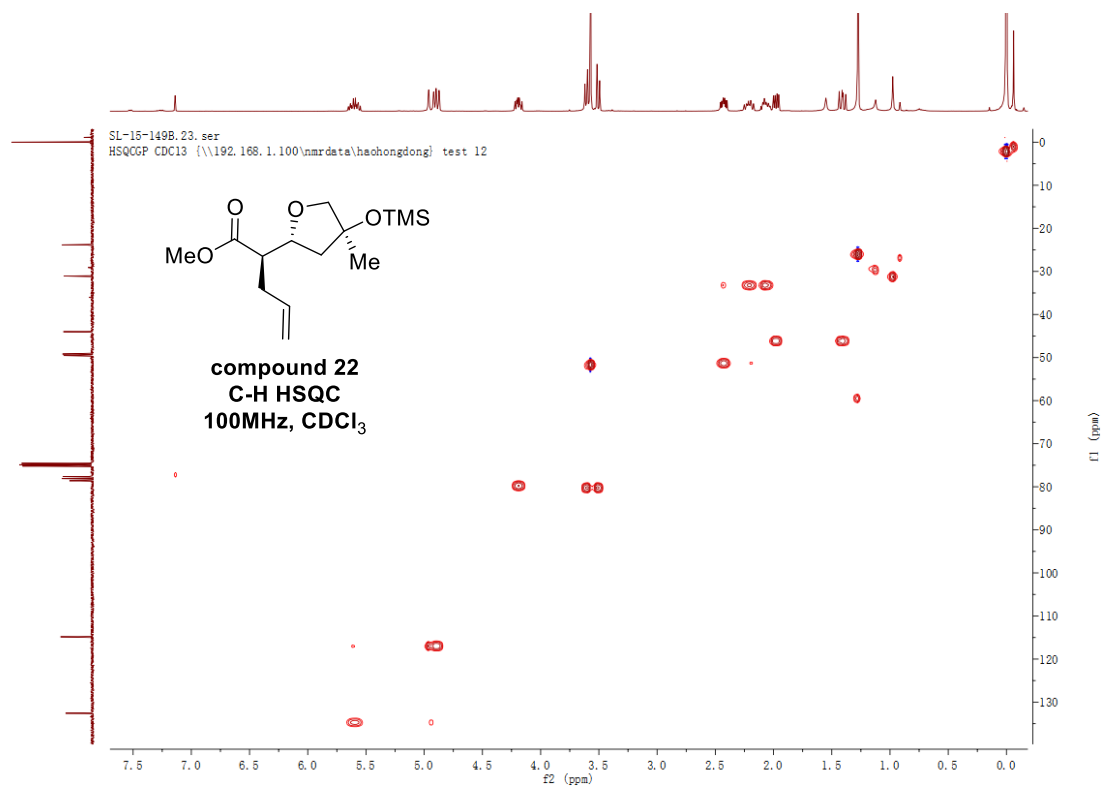



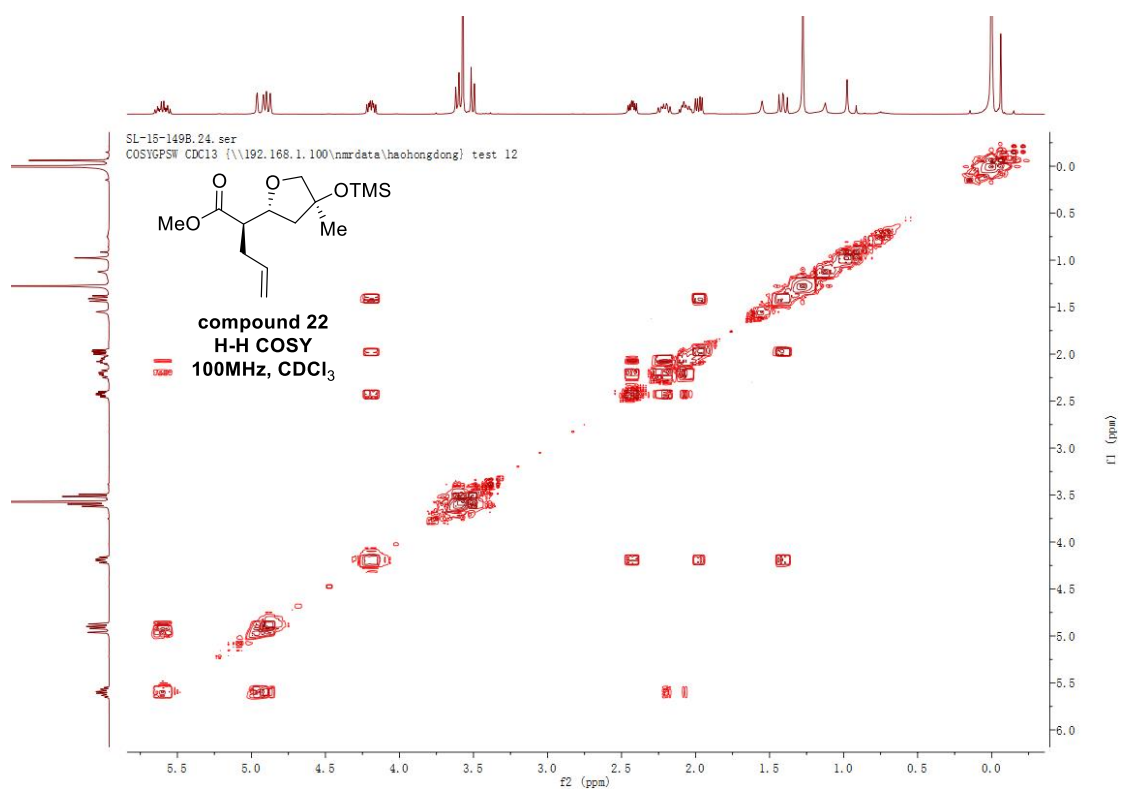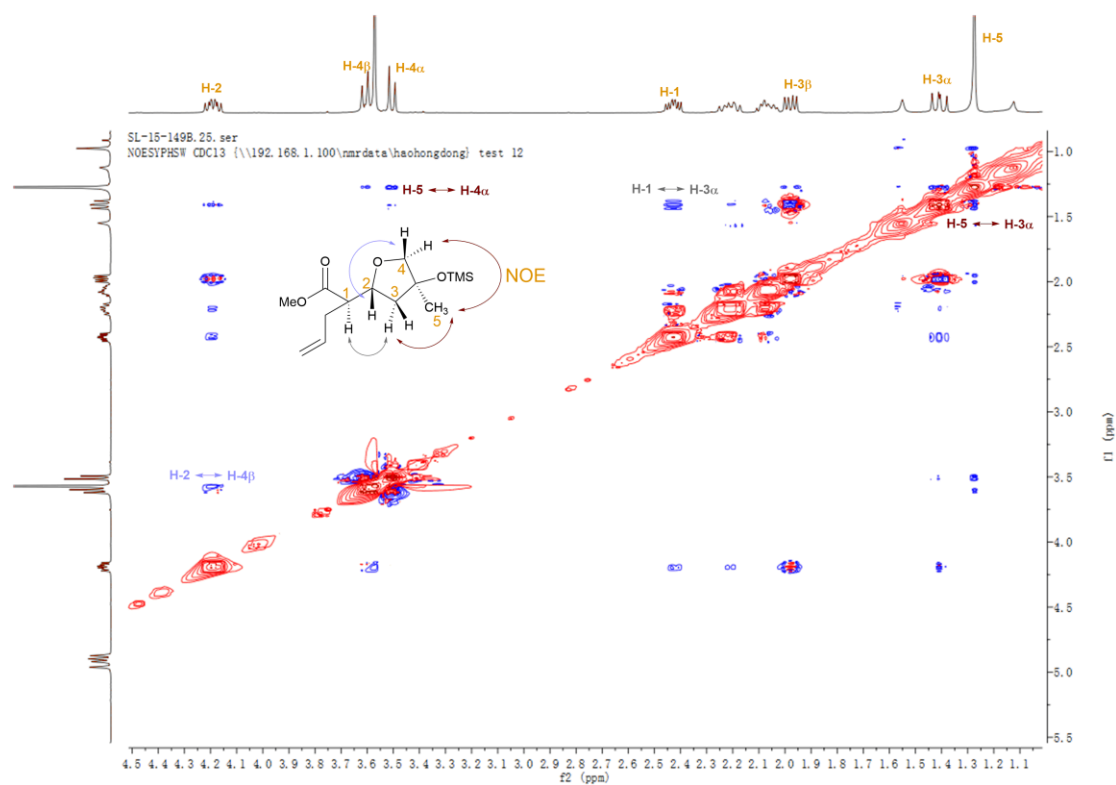

SL-5-16, 10, f1d

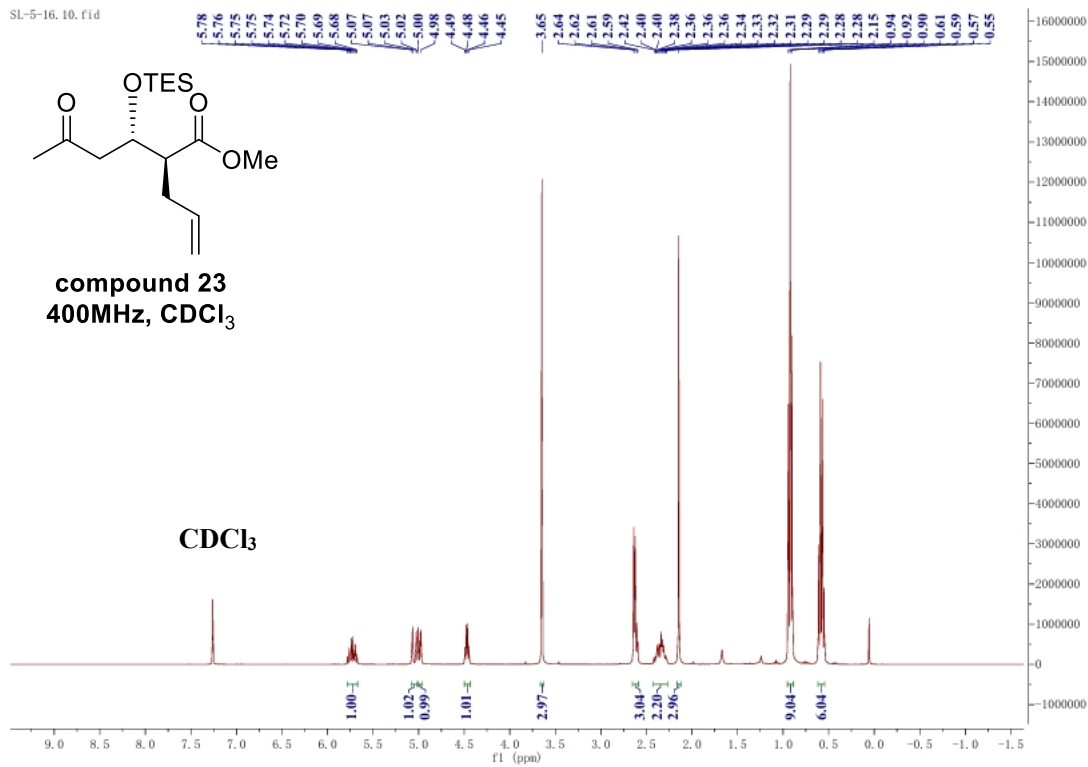

SL-5-16, 20, f1d

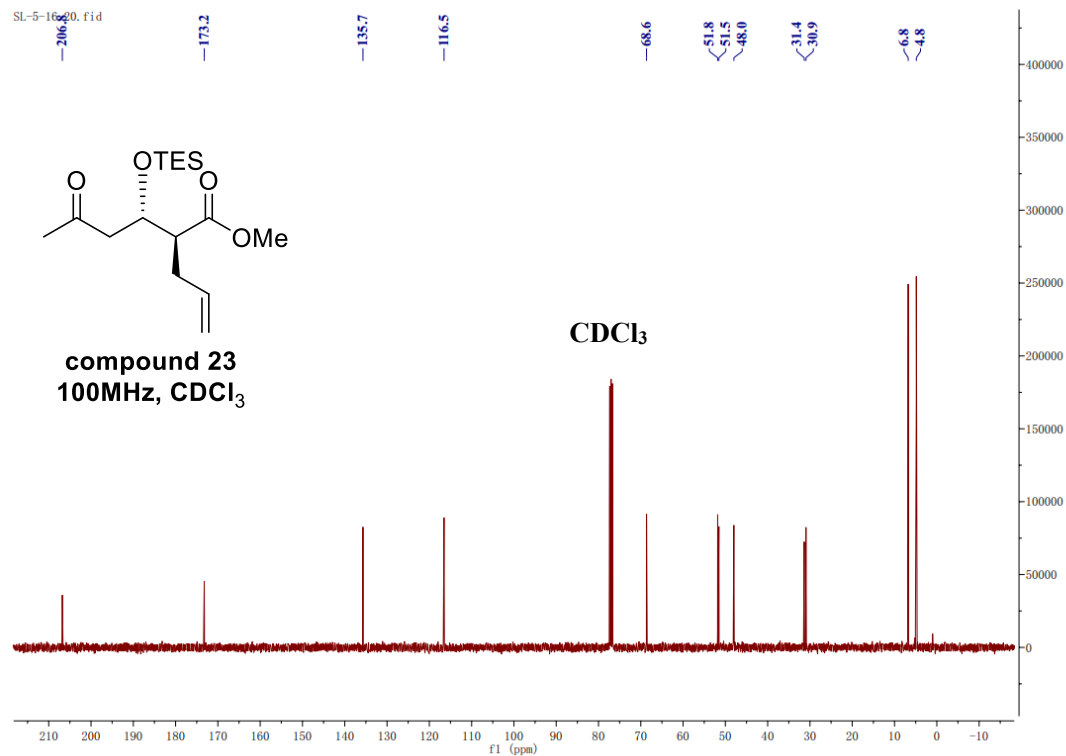



SL-6-74A.10.fid

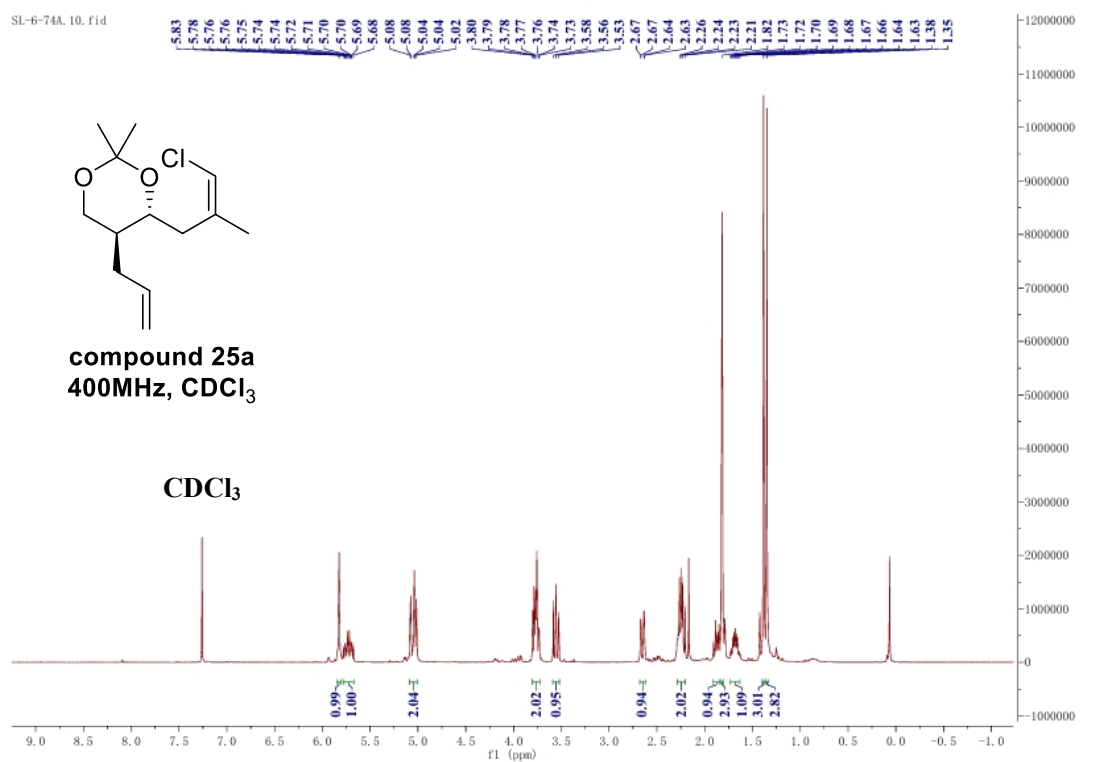

SL-6-74A.11.fid

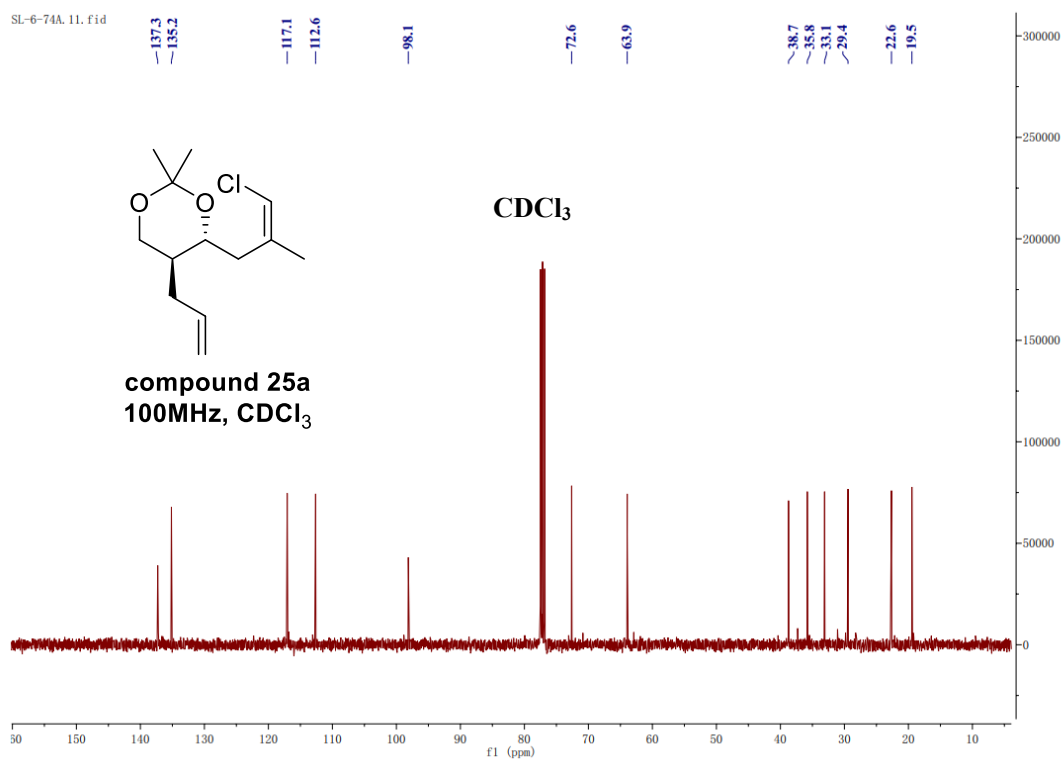

SL-6-74B. 10. fid

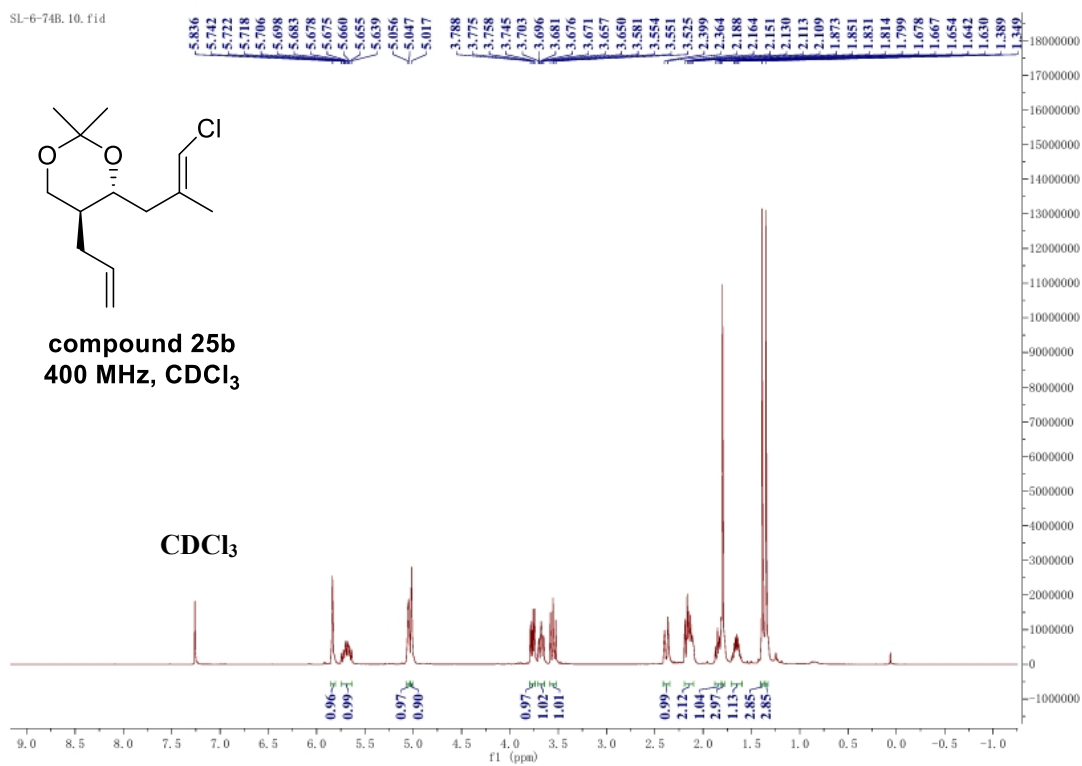

SL-6-74B. 11. fid

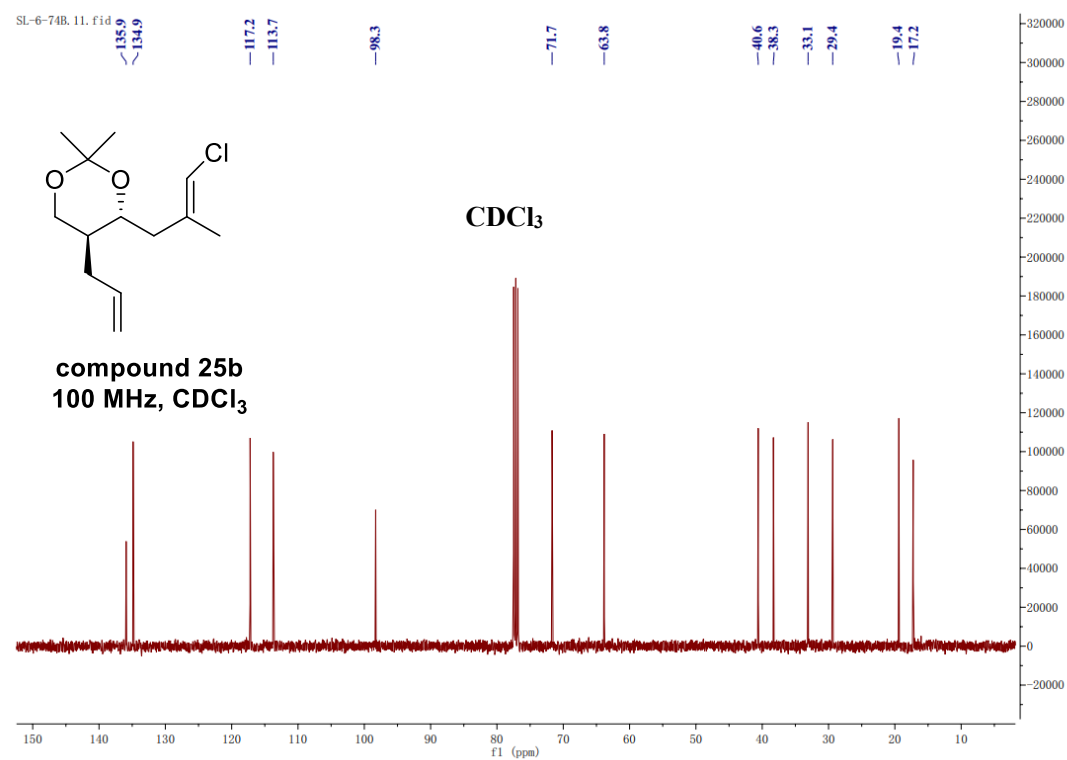

SL-5-44A.10.fid

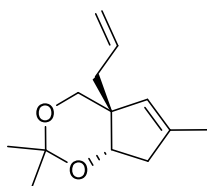

**compound 27**  
400 MHz, CDCl<sub>3</sub>

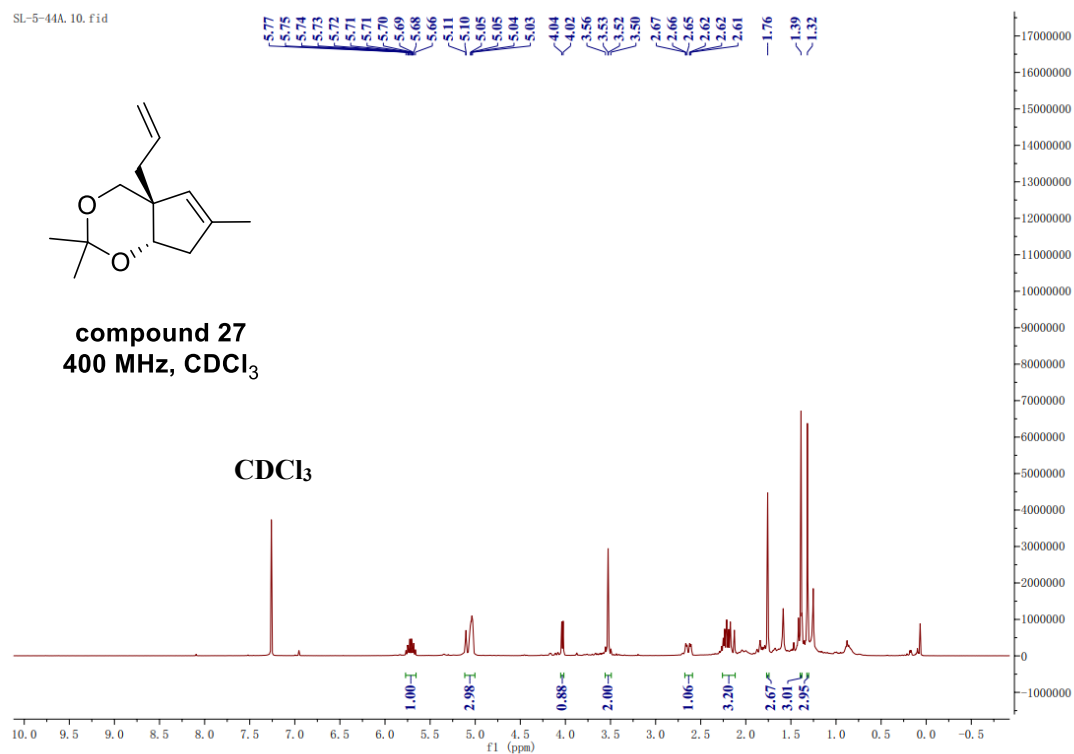

SL-5-44A.20.fid

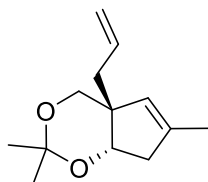

**compound 27**  
100 MHz, CDCl<sub>3</sub>

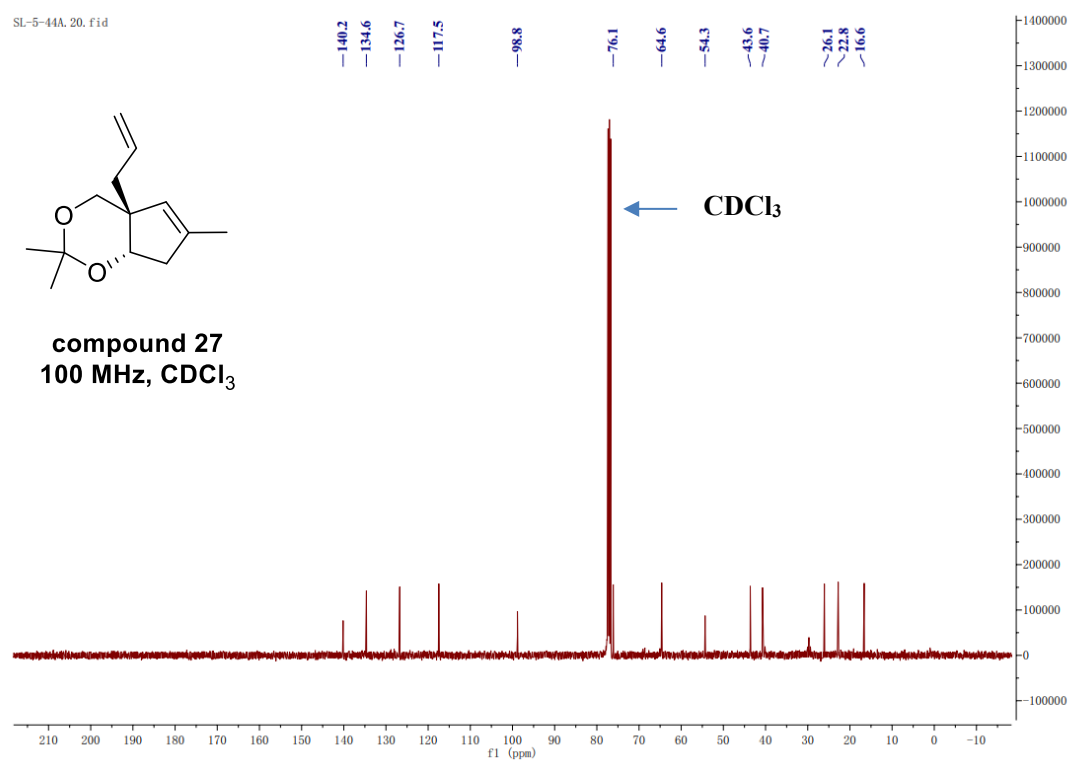

SL-6-88.11.fid

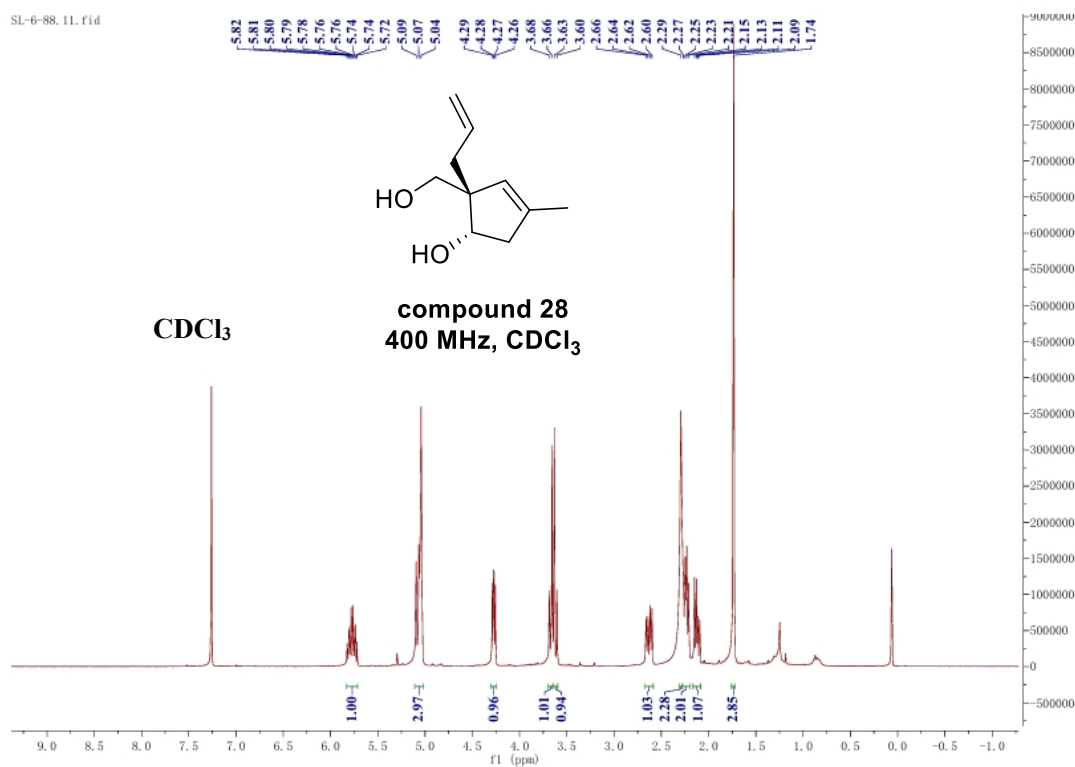

SL-6-88.12.fid

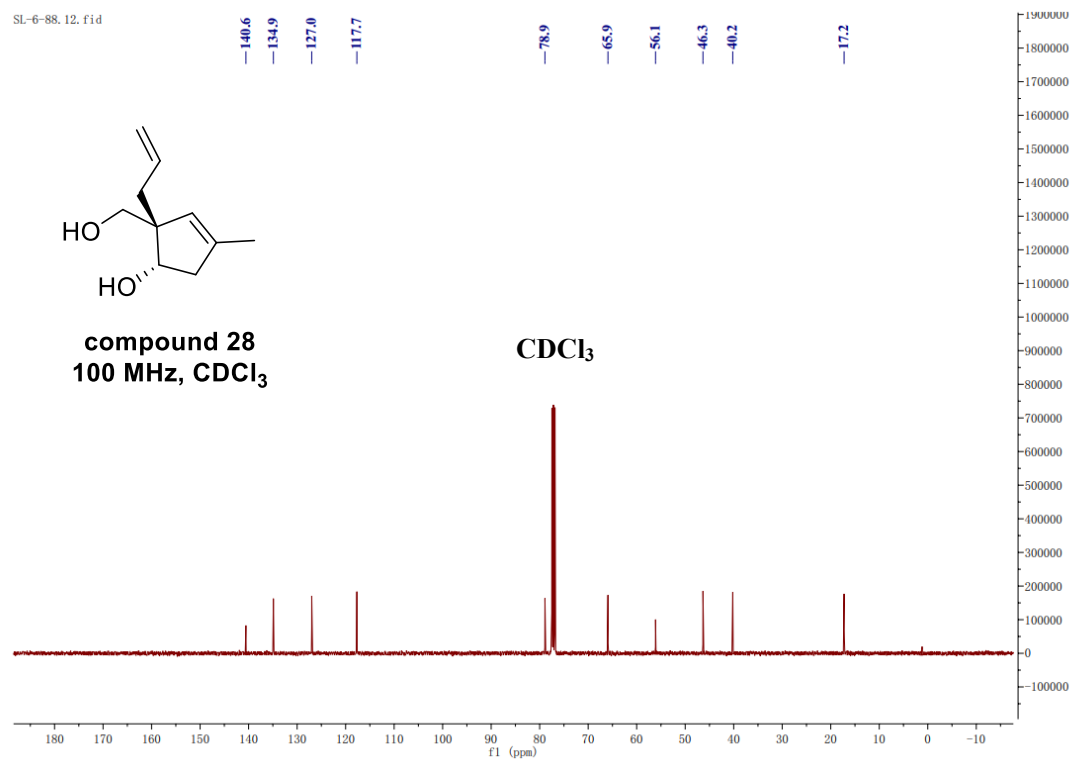

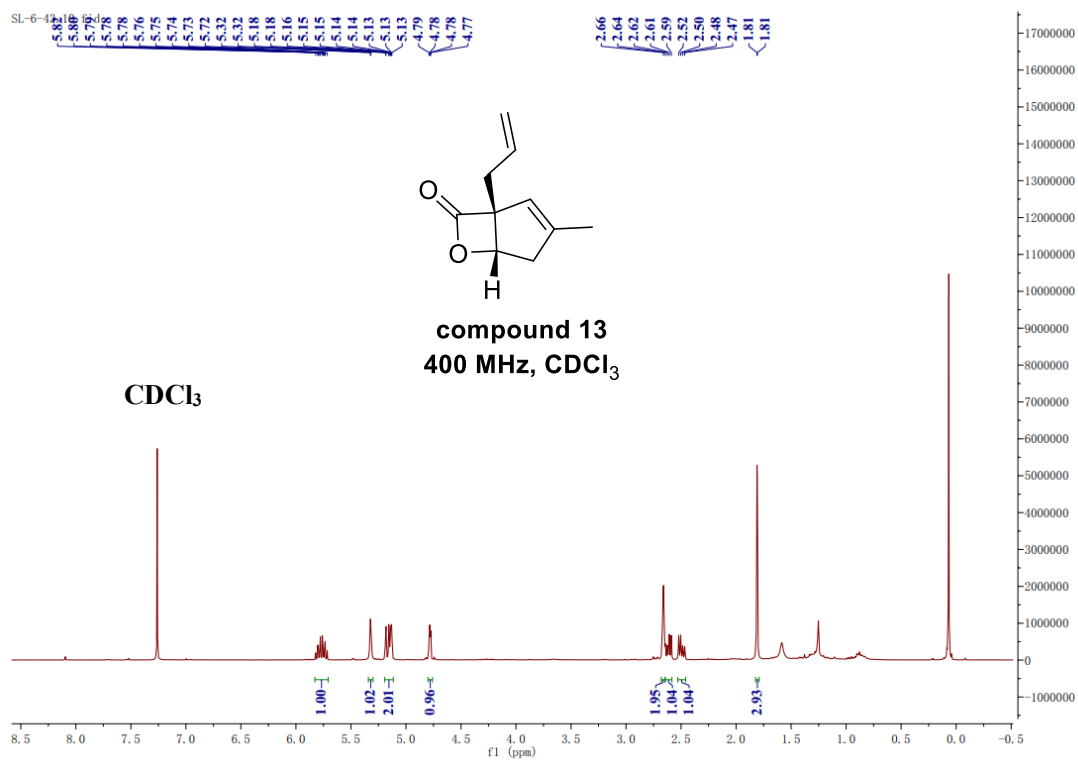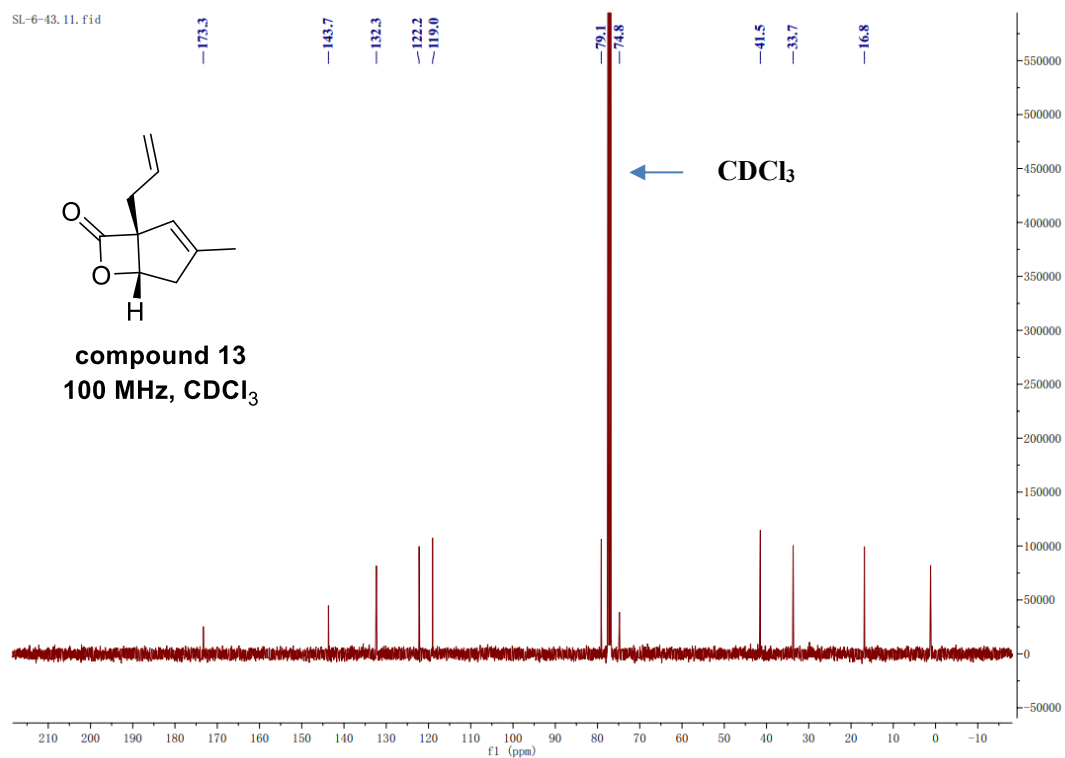

Supplement: Additional file 1 [file 1860-5397-21-182-S1.pdf]
